# Supplementary material
Source: PubMed Central journal article supplement (PMC6945465)
Supplement: AnnalsATS.201904-299OC_simon-soro_data_supplement.pdf [file AnnalsATS.201904-299OC_simon-soro_data_supplement.pdf]

## **Online Data Supplement**

### **Upper Respiratory Dysbiosis with a Facultative-Dominated Ecotype in Advanced Lung Disease and Dynamic Change after Lung Transplant**

Aurea Simon-Soro, Michael B. Sohn, John E. McGinniss, Ize Imai, Melanie C. Brown, Vincent R. Knecht, Aubrey Bailey, Erik L. Clarke, Edward Cantu, Hongzhe Li, Kyle Bittinger, Joshua M. Diamond, Jason D. Christie, Frederic D. Bushman, Ronald G. Collman

**Table E1. Clinical and demographical data of subjects.**

| SUBJECT.ID | AGE | GENDER | DISEASE     | NUMBER SAMPLES | TRANSPLANT TYPE | OUTCOME | LAS     |
|------------|-----|--------|-------------|----------------|-----------------|---------|---------|
| HUP3B10    | 65  | M      | Healthy     | 1              | None            |         |         |
| HUP3C04    | 21  | M      | Healthy     | 1              | None            |         |         |
| HUP3C05    | 28  | M      | Healthy     | 1              | None            |         |         |
| HUP3C06    | 23  | M      | Healthy     | 1              | None            |         |         |
| HUP3C07    | 40  | M      | Healthy     | 1              | None            |         |         |
| HUP3D02    | 37  | F      | Healthy     | 1              | None            |         |         |
| HUP3D03    | 51  | F      | Healthy     | 1              | None            |         |         |
| HUP3D04    | 32  | M      | Healthy     | 1              | None            |         |         |
| HUP3D06    | 41  | M      | Healthy     | 1              | None            |         |         |
| 107OW      | 34  | M      | Healthy     | 1              | None            |         |         |
| 108OW      | 49  | F      | Healthy     | 1              | None            |         |         |
| 109OW      | 38  | F      | Healthy     | 1              | None            |         |         |
| 113OW      | 33  | F      | Healthy     | 1              | None            |         |         |
| 114OW      | 37  | F      | Healthy     | 1              | None            |         |         |
| 1000798    | 64  | M      | IPF         | 1              | PreTx           |         | 36.7719 |
| 1000932    | 60  | F      | COPD        | 1              | PreTx           |         | 39.017  |
| 1000936    | 39  | F      | LAM         | 1              | PreTx           |         | 34.091  |
| 1000946    | 61  | F      | COPD        | 1              | PreTx           |         | 32.5753 |
| 1000990    | 70  | F      | COPD        | 1              | PreTx           |         | 32.1604 |
| 1001027    | 66  | F      | IPF         | 1              | PreTx           |         | 51.7943 |
| 1001035    | 46  | F      | Sarcoidosis | 1              | PreTx           |         | 35.0347 |
| 1001045    | 65  | M      | COPD        | 1              | PreTx           |         | 33      |
| 1001049    | 52  | M      | IPF         | 1              | PreTx           |         | 37.2947 |
| 1001061    | 57  | F      | COPD        | 1              | PreTx           |         | 34.48   |
| 1001062    | 59  | F      | IPF         | 1              | PreTx           |         | 41.6194 |
| 1001064    | 69  | F      | PH/PAH      | 1              | PreTx           |         | 38.1428 |
| 1001066    | 59  | F      | OB          | 1              | PreTx           |         | 45.429  |
| 1001067    | 64  | M      | IPF         | 1              | PreTx           |         | 42.42   |
| 1001068    | 65  | M      | COPD        | 1              | PreTx           |         | 33.346  |
| 1001087    | 44  | F      | LAM         | 1              | PreTx           |         | 35.1469 |
| 1001107    | 72  | M      | IPF         | 1              | PreTx           |         | 47.0169 |
| 1001109    | 59  | M      | IPF         | 1              | PreTx           |         | 59.7239 |
| 1001110    | 60  | F      | Sarcoidosis | 1              | PreTx           |         | NA      |
| 1001117    | 54  | M      | Sarcoidosis | 1              | PreTx           |         | 37.2161 |
| 1001122    | 59  | M      | IPF         | 1              | PreTx           |         | 86.9722 |
| 1001127    | 67  | F      | Sarcoidosis | 1              | PreTx           |         | NA      |

*Extended Data Tables: Simon-Soro et al. Oropharyngeal Dysbiosis before and after Lung Transplant. Annals ATS*

|             |    |   |                 |   |           |                     |         |
|-------------|----|---|-----------------|---|-----------|---------------------|---------|
| 641000068   | 64 | M | Sarcoidosis     | 3 | Bilateral | PGD                 | 39.8396 |
| 641000074   | 70 | M | COPD            | 3 | Single    | No                  | 33.4759 |
| 641000079   | 66 | F | Non-IPF         | 3 | Single    | ACR A2 at 6w, BOS   | 42.0325 |
| 641000084   | 50 | M | IPF             | 3 | Bilateral | PGD                 | 42.8918 |
| 641000085   | 60 | F | Non-IPF         | 3 | Bilateral | No                  | 35.8376 |
| 641000771   | 75 | M | COPD            | 3 | Single    | ACR A2 at 6w, PGD   | 31.8742 |
| 641000777   | 58 | F | COPD            | 3 | Bilateral | BOS, PGD            | 34.9693 |
| 641000785   | 55 | F | Re-Transplanted | 3 | Single    | ACR A2 at 3m        | 42.5993 |
| 641000802   | 52 | F | IPF             | 3 | Single    | No                  | 37.9103 |
| 641000817   | 58 | F | COPD            | 3 | Single    | No                  | 31.5751 |
| 641000827   | 53 | F | COPD            | 3 | Bilateral | PGD                 | 41.8639 |
| 641000840   | 54 | M | Pneumonitis     | 3 | Bilateral | No                  | 36.3642 |
| 641000845   | 56 | F | IPF             | 3 | Bilateral | ACR A2 at 6w and 3m | 40.4968 |
| 641000847   | 65 | M | IPF             | 3 | Single    | ACR A2 at 6w and 3m | 42.1095 |
| 641000851   | 66 | F | COPD            | 3 | Bilateral | PGD                 | 39.8834 |
| 641000854   | 66 | F | COPD            | 2 | Single    | PGD                 | 33.0739 |
| 641000857   | 61 | M | Non-IPF         | 3 | Bilateral | PGD                 | 76.684  |
| 641000879   | 51 | M | Non-IPF         | 3 | Single    | No                  | 37.2935 |
| 641000889   | 58 | M | IPF             | 2 | Bilateral | PGD                 | 89.5462 |
| 641000890   | 60 | M | Non-IPF         | 3 | Single    | ACR A2 at 6w        | 40.1042 |
| 641000891   | 35 | F | Non-IPF         | 3 | Bilateral | No                  | 40.1231 |
| 641000904   | 53 | M | Non-IPF         | 3 | Bilateral | PGD                 | 91.1559 |
| 641000912   | 70 | M | COPD            | 3 | Single    | Death               | 32.3975 |
| 641000914   | 64 | M | COPD            | 3 | Bilateral | No                  | 46.4286 |
| 641000921   | 47 | M | COPD            | 3 | Bilateral | No                  | 33.4402 |
| 641000929   | 21 | M | Non-IPF         | 3 | Bilateral | No                  | 90.5294 |
| 64710000057 | 61 | M | IPF             | 3 | Single    | BOS                 | 47.3997 |
| 64710000088 | 57 | F | Non-IPF         | 3 | Single    | ACR A2 at 3m        | 34.7478 |
| 64710000095 | 66 | M | IPF             | 3 | Single    | No                  | 89.6879 |
| 64710000098 | 65 | M | IPF             | 3 | Single    | ACR A2 at 6w, PGD   | 35.4774 |
| 64710000099 | 57 | F | Non-IPF         | 3 | Bilateral | PGD, Death          | 65.1491 |
| 64710000101 | 65 | F | COPD            | 3 | Single    | No                  | 35.8442 |
| 64710000105 | 60 | F | Non-IPF         | 3 | Single    | PGD, Death          | 55.3481 |

Abbreviations:

Gender: M= Male, F= Female

Disease: IPF= Idiopathic pulmonary fibrosis, COPD= Chronic obstructive pulmonary disease, LAM= lymphangioleiomyomatosis, PH/PAH= Pulmonary hypertension/Pulmonary arterial hypertension, OB= Obliterative bronchiolitis

Outcomes: PGD= Primary graft dysfunction, ACR= Acute cellular rejection, BOS=

LAS: Lung allocation score; NA= not available

**Table E2. Bacterial respiration phenotypes of taxa above 1% abundances.**

| GENUS                | CELL RESPIRATION | REFERENCE                       |
|----------------------|------------------|---------------------------------|
| Abiotrophia          | Facultative      | (Kawamura et al., 1995)         |
| Acinetobacter        | Aerobe           | (Bouvet and Grimont, 1986)      |
| Actinobacillus       | Facultative      | (Olsen and Møller, 2015)        |
| Actinomyces          | Facultative      | (Hall, 2005)                    |
| Aggregatibacter      | Facultative      | (Norskov-Lauritsen, 2006)       |
| Agrobacterium        | Aerobe           | (Sawada et al., 1993)           |
| Alicyclobacillus     | Aerobe           | (Wisotzkey et al., 1992)        |
| Anaerococcus         | Anaerobe         | (Ezaki and Ohkusu, 2015)        |
| Anaerovorax          | Anaerobe         | (Matthies et al., 2000)         |
| Anoxybacillus        | Facultative      | (Pikuta, 2003)                  |
| Arthrobacter         | Aerobe           | (Koch et al., 1995)             |
| Atopobium            | Anaerobe         | (Cools et al., 2014)            |
| Bacillus             | Facultative      | (Logan and Vos, 2015)           |
| Bifidobacterium      | Anaerobe         | (Crociani et al., 1996)         |
| Bilophila            | Anaerobe         | (Baron, 2015)                   |
| Bradyrhizobium       | Aerobe           | (Jordan, 1982)                  |
| Brevibacterium       | Aerobe           | (Trujillo and Goodfellow, 2015) |
| Bulleidia            | Anaerobe         | (Downes et al., 2000)           |
| Butyrivibrio         | Anaerobe         | (Willems and Collins, 2015a)    |
| Caldicellulosiruptor | Anaerobe         | (Rainey et al., 1994)           |
| Campylobacter        | Anaerobic        | (Etoh et al., 1993)             |
| Capnocytophaga       | Facultative      | (London et al., 1985)           |
| Cardiobacterium      | Facultative      | (Paster and Dewhirst, 2015)     |
| Catonella            | Anaerobe         | (Moore and Moore, 1994)         |
| Chryseobacterium     | Aerobe           | (Bernardet et al., 2015)        |
| Cloacibacterium      | Facultative      | (Allen, 2006)                   |
| Clostridium          | Anaerobe         | (Rainey et al., 2015)           |
| Conchiformibius      | Aerobe           | (Xie and Yokota, 2005)          |
| Coprococcus          | Anaerobe         | (Holdeman and Moore, 1974)      |
| Corynebacterium      | Facultative      | (Bernard and Funke, 2015)       |
| Curtobacterium       | Aerobe           | (Yamada and Komagata, 1972)     |
| Delftia              | Aerobe           | (Wen et al., 1999)              |
| Dermacoccus          | Aerobe           | (Stackebrandt et al., 1995)     |
| Desulfobulbus        | Anaerobe         | (Kuever et al., 2015)           |
| Desulfomicrobium     | Anaerobe         | (Langendijk et al., 2001)       |
| Dialister            | Anaerobe         | (Downes, 2003)                  |

*Extended Data Tables: Simon-Soro et al. Oropharyngeal Dysbiosis before and after Lung Transplant. Annals ATS*

|                   |             |                                    |
|-------------------|-------------|------------------------------------|
| Eikenella         | Facultative | (Jackson and Goodman, 1972)        |
| Enhydrobacter     | Facultative | (Staley et al., 1987)              |
| Enterococcus      | Facultative | (Schleifer and Kilpper-Balz, 1984) |
| Erwinia           | Facultative | (Hauben and Swings, 2015)          |
| Exiguobacterium   | Facultative | (Collins, 2015)                    |
| Filifactor        | Anaerobe    | (Jalava and Eerola, 2015)          |
| Finegoldia        | Anaerobe    | (Ezaki, 2015a)                     |
| Flavobacterium    | Aerobe      | (Bernardet and Bowman, 2015)       |
| Fusobacterium     | Anaerobe    | (Gharbia et al., 2015)             |
| Gemella           | Facultative | (Collins and Falsen, 2015)         |
| Geobacillus       | Aerobe      | (Ivanov et al., 2001)              |
| Gordonia          | Aerobe      | (Goodfellow et al., 2015)          |
| Granulicatella    | Facultative | (Lawson, 2015)                     |
| Haemophilus       | Facultative | (Kilian, 2015)                     |
| Herbaspirillum    | Anaerobe    | (Baldani et al., 2015)             |
| Janthinobacterium | Aerobe      | (Gillis and Logan, 2015)           |
| Jonquetella       | Anaerobe    | (Jumas-Bilak et al., 2007)         |
| Kingella          | Aerobe      | (Weyant, 2015)                     |
| Lactobacillus     | Facultative | (Hammes and Hertel, 2015)          |
| Lactococcus       | Facultative | (Teuber, 2015)                     |
| Lautropia         | Facultative | (Gerner-Smidt, 2015)               |
| Leptotrichia      | Anaerobe    | (Eisenberg et al., 2018a)          |
| Leuconostoc       | Facultative | (Holzapfel et al., 2015a)          |
| Luteibacter       | Aerobe      | (Johansen, 2005)                   |
| Macrococcus       | Facultative | (Schleifer, 2015)                  |
| Megasphaera       | Anaerobe    | (Marchandin et al., 2015)          |
| Meiothermus       | Aerobe      | (Nobre et al., 1996)               |
| Methylobacterium  | Aerobe      | (Green, 2015)                      |
| Microbacterium    | Aerobe      | (Suzuki and Hamada, 2015)          |
| Micrococcus       | Aerobe      | (Busse, 2015)                      |
| Mobiluncus        | Anaerobe    | (Hoyles and McCartney, 2015)       |
| Modestobacter     | Aerobe      | (Normand and Benson, 2015)         |
| Mogibacterium     | Anaerobe    | (The Editorial Board, 2015a)       |
| Moraxella         | Aerobe      | (Juni and Bøvre, 2015)             |
| Moryella          | Anaerobe    | (Carlier, 2015a)                   |
| Mycobacterium     | Aerobe      | (Magee and Ward, 2015)             |
| Mycoplasma        | Facultative | (Brown et al., 2018)               |
| Neisseria         | Aerobe      | (Tønjum, 2015)                     |
| Nesterenkonia     | Aerobe      | (Stackebrandt, 2015)               |

*Extended Data Tables: Simon-Soro et al. Oropharyngeal Dysbiosis before and after Lung Transplant. Annals ATS*

|                    |             |                               |
|--------------------|-------------|-------------------------------|
| Ochrobactrum       | Aerobic     | (Kämpfer et al., 2018)        |
| Oribacterium       | Anaerobe    | (Carlier, 2015b)              |
| Paenibacillus      | Facultative | (Priest, 2015)                |
| Paludibacter       | Anaerobe    | (Ueki, 2006)                  |
| Paracoccus         | Aerobe      | (van Spanning et al., 2015)   |
| Parvimonas         | Anaerobe    | (The Editorial Board, 2015b)  |
| Pediococcus        | Facultative | (Holzapfel et al., 2015b)     |
| Peptococcus        | Anaerobe    | (Ezaki, 2015b)                |
| Peptoniphilus      | Anaerobe    | (Ezaki and Kawamura, 2015)    |
| Peptostreptococcus | Anaerobe    | (Ezaki, 2015c)                |
| Phenylobacterium   | Aerobe      | (Eberspächer, 2015)           |
| Porphyromonas      | Anaerobe    | (Summanen and Finegold, 2015) |
| Prevotella         | Anaerobe    | (Shah et al., 2015)           |
| Propionibacterium  | Anaerobe    | (Patrick and McDowell, 2015)  |
| Propionivibrio     | Anaerobe    | (The Editorial Board, 2015c)  |
| Pseudomonas        | Aerobe      | (Palleroni, 2015a)            |
| Pseudoramibacter   | Anaerobe    | (Willems and Collins, 2015b)  |
| Psychrobacter      | Aerobe      | (Juni, 2015)                  |
| Pyramidobacter     | Anaerobe    | (Downes et al., 2009)         |
| Ralstonia          | Aerobe      | (Yabuuchi et al., 2015)       |
| Rheinheimera       | Aerobe      | (Brettar et al., 2002)        |
| Rhizobium          | Aerobe      | (Kuykendall et al., 2015)     |
| Rhodobacter        | Anaerobe    | (Imhoff, 2015)                |
| Rhodococcus        | Aerobe      | (Jones and Goodfellow, 2015)  |
| Roseomonas         | Aerobe      | (Weyant and Whitney, 2015)    |
| Rothia             | Facultative | (Austin, 2015)                |
| Rubellimicrobium   | Aerobe      | (Denner, 2006)                |
| Ruminococcus       | Anaerobe    | (Ezaki, 2015d)                |
| Saccharopolyspora  | Aerobe      | (Kim and Goodfellow, 2015)    |
| Salinispora        | Aerobe      | (Jensen et al., 2015)         |
| Scardovia          | Anaerobe    | (Downes et al., 2011)         |
| Schwartzia         | Anaerobe    | (Rainey, 2015)                |
| Selenomonas        | Anaerobe    | (Shouche et al., 2015)        |
| Sharpea            | Anaerobe    | (Morita et al., 2008)         |
| Shuttleworthia     | Anaerobe    | (Wade and Downes, 2015)       |
| Slackia            | Anaerobe    | (Wade and Dewhirst, 2015)     |
| Sneathia           | Anaerobe    | (Eisenberg et al., 2018b)     |
| Sphaerochaeta      | Anaerobe    | (Ritalahti et al., 2012)      |
| Sphingomonas       | Aerobe      | (Yabuuchi and Kosako, 2015)   |

*Extended Data Tables: Simon-Soro et al. Oropharyngeal Dysbiosis before and after Lung Transplant. Annals ATS*

|                  |             |                            |
|------------------|-------------|----------------------------|
| Staphylococcus   | Facultative | (Schleifer and Bell, 2015) |
| Stenotrophomonas | Aerobe      | (Palleroni, 2015b)         |
| Streptococcus    | Facultative | (Whiley and Hardie, 2015)  |
| Streptomyces     | Aerobe      | (Kämpfer, 2015)            |
| Sporobacterium   | Anaerobe    | (Mechichi and Patel, 2015) |
| Tannerella       | Anaerobe    | (Sakamoto et al., 2015)    |
| Treponema        | Anaerobe    | (Norris et al., 2015)      |
| Ureaplasma       | Facultative | (Robertson et al., 2018)   |
| Varibaculum      | Facultative | (Hirakawa et al., 2015)    |
| Variovorax       | Aerobe      | (Willems et al., 2015)     |
| Veillonella      | Anaerobe    | (Carlier, 2015c)           |

**Table E3. Correlation between ecological approaches show respiratory metabolism as key independent variables**

|                             | <b>Aerobe</b> | <b>Anaerobe</b> | <b>Facultative</b> | <b>Oral pH</b> | <b><i>Streptococcus</i></b> | <b><i>Prevotella</i></b> | <b><i>Neisseria</i></b> |
|-----------------------------|---------------|-----------------|--------------------|----------------|-----------------------------|--------------------------|-------------------------|
| <b>Aerobe</b>               | 1             | -               | -                  | -              | -                           | -                        | -                       |
| <b>Anaerobe</b>             | -0.2747       | 1               | -                  | -              | -                           | -                        | -                       |
| <b>Facultative</b>          | -0.3762       | -0.7295         | 1                  | -              | -                           | -                        | -                       |
| <b>Oral pH</b>              | 0.2436        | 0.1163          | -0.3788            | 1              | -                           | -                        | -                       |
| <b><i>Streptococcus</i></b> | -0.211        | -0.6937         | 0.851              | -0.2137        | 1                           | -                        | -                       |
| <b><i>Prevotella</i></b>    | -0.3173       | 0.8879          | -0.6246            | 0.0545         | -0.5992                     | 1                        | -                       |
| <b><i>Neisseria</i></b>     | 0.7726        | -0.0421         | -0.5165            | 0.3617         | -0.4017                     | -0.072                   | 1                       |



**Table E4. Impact of antibacterial or immunosuppressive therapy on Pre-Tx dysbiosis.**

|                          | current antibacterials (n=7) | no antibacterials (n=15) | P value <sup>a</sup> | current immunosuppressive (n=11) | no immunosuppressive (n=11) | P value <sup>a</sup> |
|--------------------------|------------------------------|--------------------------|----------------------|----------------------------------|-----------------------------|----------------------|
| Richness <sup>b</sup>    | 311                          | 285                      | 0.45                 | 306                              | 280                         | 0.37                 |
| Diversity <sup>b</sup>   | 3.88                         | 3.58                     | 0.33                 | 3.80                             | 3.55                        | 0.27                 |
| PAM group 1 <sup>b</sup> | 6                            | 13                       | 1                    | 8                                | 11                          | 0.21                 |
| PAM group 2              | 1                            | 2                        |                      | 0                                | 3                           |                      |
| PAM group 3              | 0                            | 0                        |                      | 0                                | 0                           |                      |

<sup>a</sup> Richness and diversity were tested using Wilcoxon rank sum test, and for PAM group using Chi-square.

<sup>b</sup> Richness and diversity indicated by means, and PAM group by number in each category.

## REFERENCES

- Allen, T.D. (2006). *Cloacibacterium normanense* gen. nov., sp. nov., a novel bacterium in the family Flavobacteriaceae isolated from municipal wastewater. *Int. J. Syst. Evol. Microbiol.* 56, 1311–1316.
- Austin, B. (2015). *Rothia*. In *Bergey's Manual of Systematics of Archaea and Bacteria*, W.B. Whitman, F. Rainey, P. Kämpfer, M. Trujillo, J. Chun, P. DeVos, B. Hedlund, and S. Dedysh, eds. (Chichester, UK: John Wiley & Sons, Ltd), pp. 1–13.
- Baldani, J.I., Baldani, V.L.D., and Döbereiner, J. (2015). *Herbaspirillum*. In *Bergey's Manual of Systematics of Archaea and Bacteria*, W.B. Whitman, F. Rainey, P. Kämpfer, M. Trujillo, J. Chun, P. DeVos, B. Hedlund, and S. Dedysh, eds. (Chichester, UK: John Wiley & Sons, Ltd), pp. 1–13.
- Baron, E.J. (2015). *Bilophila*. In *Bergey's Manual of Systematics of Archaea and Bacteria*, W.B. Whitman, F. Rainey, P. Kämpfer, M. Trujillo, J. Chun, P. DeVos, B. Hedlund, and S. Dedysh, eds. (Chichester, UK: John Wiley & Sons, Ltd), pp. 1–5.
- Bernard, K.A., and Funke, G. (2015). *Corynebacterium*. In *Bergey's Manual of Systematics of Archaea and Bacteria*, W.B. Whitman, F. Rainey, P. Kämpfer, M. Trujillo, J. Chun, P. DeVos, B. Hedlund, and S. Dedysh, eds. (Chichester, UK: John Wiley & Sons, Ltd), pp. 1–70.
- Bernardet, J.-F., and Bowman, J.P. (2015). *Flavobacterium*. In *Bergey's Manual of Systematics of Archaea and Bacteria*, W.B. Whitman, F. Rainey, P. Kämpfer, M. Trujillo, J. Chun, P. DeVos, B. Hedlund, and S. Dedysh, eds. (Chichester, UK: John Wiley & Sons, Ltd), pp. 1–75.
- Bernardet, J.-F., Hugo, C.J., and Bruun, B. (2015). *Chryseobacterium*. In *Bergey's Manual of Systematics of Archaea and Bacteria*, W.B. Whitman, F. Rainey, P. Kämpfer, M. Trujillo, J. Chun, P. DeVos, B. Hedlund, and S. Dedysh, eds. (Chichester, UK: John Wiley & Sons, Ltd), pp. 1–35.
- Bouvet, P.J.M., and Grimont, P.A.D. (1986). Taxonomy of the Genus *Acinetobacter* with the Recognition of *Acinetobacter baumannii* sp. nov., *Acinetobacter haemolyticus* sp. nov., *Acinetobacter johnsonii* sp. nov., and *Acinetobacter junii* sp. nov. and Emended Descriptions of *Acinetobacter calcoaceticus* and *Acinetobacter lwoffii*. *Int. J. Syst. Bacteriol.* 36, 228–240.
- Brettar, I., Christen, R., and Höfle, M.G. (2002). *Rheinheimera baltica* gen. nov., sp. nov., a blue-coloured bacterium isolated from the central Baltic Sea. *Int. J. Syst. Evol. Microbiol.* 52, 1851–1857.
- Brown, D.R., May, M., Bradbury, J.M., Balish, M.F., Calcutt, M.J., Glass, J.I., Tasker, S., Messick, J.B., Johansson, K.-E., and Neimark, H. (2018). *Mycoplasma*. In *Bergey's Manual of Systematics of Archaea and Bacteria*, W.B. Whitman, F. Rainey, P. Kämpfer, M. Trujillo, J. Chun, P. DeVos, B. Hedlund, and S. Dedysh, eds. (Chichester, UK: John Wiley & Sons, Ltd), pp. 1–78.

Busse, H.-J. (2015). *Micrococcus*. In Bergey's Manual of Systematics of Archaea and Bacteria, W.B. Whitman, F. Rainey, P. Kämpfer, M. Trujillo, J. Chun, P. DeVos, B. Hedlund, and S. Dedysh, eds. (Chichester, UK: John Wiley & Sons, Ltd), pp. 1–12.

Carlier, J.-P. (2015a). *Moryella*. In Bergey's Manual of Systematics of Archaea and Bacteria, W.B. Whitman, F. Rainey, P. Kämpfer, M. Trujillo, J. Chun, P. DeVos, B. Hedlund, and S. Dedysh, eds. (Chichester, UK: John Wiley & Sons, Ltd), pp. 1–4.

Carlier, J.-P. (2015b). *Oribacterium*. In Bergey's Manual of Systematics of Archaea and Bacteria, W.B. Whitman, F. Rainey, P. Kämpfer, M. Trujillo, J. Chun, P. DeVos, B. Hedlund, and S. Dedysh, eds. (Chichester, UK: John Wiley & Sons, Ltd), pp. 1–5.

Carlier, J.-P. (2015c). *Veillonella*. In Bergey's Manual of Systematics of Archaea and Bacteria, W.B. Whitman, F. Rainey, P. Kämpfer, M. Trujillo, J. Chun, P. DeVos, B. Hedlund, and S. Dedysh, eds. (Chichester, UK: John Wiley & Sons, Ltd), pp. 1–11.

Collins, M.D. (2015). *Exiguobacterium*. In Bergey's Manual of Systematics of Archaea and Bacteria, W.B. Whitman, F. Rainey, P. Kämpfer, M. Trujillo, J. Chun, P. DeVos, B. Hedlund, and S. Dedysh, eds. (Chichester, UK: John Wiley & Sons, Ltd), pp. 1–6.

Collins, M.D., and Falsen, E. (2015). *Gemella*. In Bergey's Manual of Systematics of Archaea and Bacteria, W.B. Whitman, F. Rainey, P. Kämpfer, M. Trujillo, J. Chun, P. DeVos, B. Hedlund, and S. Dedysh, eds. (Chichester, UK: John Wiley & Sons, Ltd), pp. 1–8.

Cools, P., Oyaert, M., Vaneechoutte, M., De Laere, E., and Vervaeke, S. (2014). *Atopobium deltae* sp. nov., isolated from the blood of a patient with Fournier's gangrene. *Int. J. Syst. Evol. Microbiol.* 64, 3140–3145.

Crociani, F., Biavati, B., Alessandrini, A., Chiarini, C., and Scardovi, V. (1996). *Bifidobacterium inopinatum* sp. nov. and *Bifidobacterium denticolens* sp. nov., Two New Species Isolated from Human Dental Caries. *Int. J. Syst. Bacteriol.* 46, 564–571.

Denner, E.B.M. (2006). *Rubellimicrobium thermophilum* gen. nov., sp. nov., a red-pigmented, moderately thermophilic bacterium isolated from coloured slime deposits in paper machines. *Int. J. Syst. Evol. Microbiol.* 56, 1355–1362.

Downes, J. (2003). *Dialister invisus* sp. nov., isolated from the human oral cavity. *Int. J. Syst. Evol. Microbiol.* 53, 1937–1940.

Downes, J., Olsvik, B., Hiom, S.J., Spratt, D.A., Cheeseman, S.L., Olsen, I., Weightman, A.J., and Wade, W.G. (2000). *Bulleidia extracta* gen. nov., sp. nov., isolated from the oral cavity. *Int. J. Syst. Evol. Microbiol.* 50, 979–983.

Downes, J., Vartoukian, S.R., Dewhirst, F.E., Izzard, J., Chen, T., Yu, W.-H., Sutcliffe, I.C., and Wade, W.G. (2009). *Pyramidobacter piscicolens* gen. nov., sp. nov., a member of the phylum "Synergistetes" isolated from the human oral cavity. *Int. J. Syst. Evol. Microbiol.* 59, 972–980.

Downes, J., Mantzourani, M., Beighton, D., Hooper, S., Wilson, M.J., Nicholson, A., and Wade, W.G. (2011). *Scardovia wiggisiae* sp. nov., isolated from the human oral cavity and clinical

material, and emended descriptions of the genus *Scardovia* and *Scardovia inopinata*. *Int. J. Syst. Evol. Microbiol.* 61, 25–29.

Eberspächer, J. (2015). *Phenylobacterium*. In *Bergey's Manual of Systematics of Archaea and Bacteria*, W.B. Whitman, F. Rainey, P. Kämpfer, M. Trujillo, J. Chun, P. DeVos, B. Hedlund, and S. Dedysh, eds. (Chichester, UK: John Wiley & Sons, Ltd), pp. 1–12.

Eisenberg, T., Glaeser, S.P., Blom, J., and Kämpfer, P. (2018a). *Leptotrichia*. In *Bergey's Manual of Systematics of Archaea and Bacteria*, W.B. Whitman, F. Rainey, P. Kämpfer, M. Trujillo, J. Chun, P. DeVos, B. Hedlund, and S. Dedysh, eds. (Chichester, UK: John Wiley & Sons, Ltd), pp. 1–10.

Eisenberg, T., Glaeser, S.P., Blom, J., and Kämpfer, P. (2018b). *Sneathia*. In *Bergey's Manual of Systematics of Archaea and Bacteria*, W.B. Whitman, F. Rainey, P. Kämpfer, M. Trujillo, J. Chun, P. DeVos, B. Hedlund, and S. Dedysh, eds. (Chichester, UK: John Wiley & Sons, Ltd), pp. 1–8.

Etoh, Y., Dewhirst, F.E., Paster, B.J., Yamamoto, A., and Goto, N. (1993). *Campylobacter showae* sp. nov., Isolated from the Human Oral Cavity. *Int. J. Syst. Bacteriol.* 43, 631–639.

Ezaki, T. (2015a). *Finegoldia*. In *Bergey's Manual of Systematics of Archaea and Bacteria*, W.B. Whitman, F. Rainey, P. Kämpfer, M. Trujillo, J. Chun, P. DeVos, B. Hedlund, and S. Dedysh, eds. (Chichester, UK: John Wiley & Sons, Ltd), pp. 1–3.

Ezaki, T. (2015b). *Peptococcus*. In *Bergey's Manual of Systematics of Archaea and Bacteria*, W.B. Whitman, F. Rainey, P. Kämpfer, M. Trujillo, J. Chun, P. DeVos, B. Hedlund, and S. Dedysh, eds. (Chichester, UK: John Wiley & Sons, Ltd), pp. 1–3.

Ezaki, T. (2015c). *Peptostreptococcus*. In *Bergey's Manual of Systematics of Archaea and Bacteria*, W.B. Whitman, F. Rainey, P. Kämpfer, M. Trujillo, J. Chun, P. DeVos, B. Hedlund, and S. Dedysh, eds. (Chichester, UK: John Wiley & Sons, Ltd), pp. 1–4.

Ezaki, T. (2015d). *Ruminococcus*. In *Bergey's Manual of Systematics of Archaea and Bacteria*, W.B. Whitman, F. Rainey, P. Kämpfer, M. Trujillo, J. Chun, P. DeVos, B. Hedlund, and S. Dedysh, eds. (Chichester, UK: John Wiley & Sons, Ltd), pp. 1–5.

Ezaki, T., and Kawamura, Y. (2015). *Peptoniphilus*. In *Bergey's Manual of Systematics of Archaea and Bacteria*, W.B. Whitman, F. Rainey, P. Kämpfer, M. Trujillo, J. Chun, P. DeVos, B. Hedlund, and S. Dedysh, eds. (Chichester, UK: John Wiley & Sons, Ltd), pp. 1–4.

Ezaki, T., and Ohkusu, K. (2015). *Anaerococcus*. In *Bergey's Manual of Systematics of Archaea and Bacteria*, W.B. Whitman, F. Rainey, P. Kämpfer, M. Trujillo, J. Chun, P. DeVos, B. Hedlund, and S. Dedysh, eds. (Chichester, UK: John Wiley & Sons, Ltd), pp. 1–5.

Gerner-Smidt, P. (2015). *Lautropia*. In *Bergey's Manual of Systematics of Archaea and Bacteria*, W.B. Whitman, F. Rainey, P. Kämpfer, M. Trujillo, J. Chun, P. DeVos, B. Hedlund, and S. Dedysh, eds. (Chichester, UK: John Wiley & Sons, Ltd), pp. 1–3.

Gharbia, S.E., Shah, H.N., and Edwards, K.J. (2015). *Fusobacterium*. In *Bergey's Manual of Systematics of Archaea and Bacteria*, W.B. Whitman, F. Rainey, P. Kämpfer, M. Trujillo, J.

Chun, P. DeVos, B. Hedlund, and S. Dedysh, eds. (Chichester, UK: John Wiley & Sons, Ltd), pp. 1–18.

Gillis, M., and Logan, N.A. (2015). *Janthinobacterium*. In Bergey's Manual of Systematics of Archaea and Bacteria, W.B. Whitman, F. Rainey, P. Kämpfer, M. Trujillo, J. Chun, P. DeVos, B. Hedlund, and S. Dedysh, eds. (Chichester, UK: John Wiley & Sons, Ltd), pp. 1–12.

Goodfellow, M., Kumar, Y., and Maldonado, L.A. (2015). *Gordonia*. In Bergey's Manual of Systematics of Archaea and Bacteria, W.B. Whitman, F. Rainey, P. Kämpfer, M. Trujillo, J. Chun, P. DeVos, B. Hedlund, and S. Dedysh, eds. (Chichester, UK: John Wiley & Sons, Ltd), pp. 1–29.

Green, P.N. (2015). *Methylobacterium*. In Bergey's Manual of Systematics of Archaea and Bacteria, W.B. Whitman, F. Rainey, P. Kämpfer, M. Trujillo, J. Chun, P. DeVos, B. Hedlund, and S. Dedysh, eds. (Chichester, UK: John Wiley & Sons, Ltd), pp. 1–8.

Hall, V. (2005). *Actinomyces dentalis* sp. nov., from a human dental abscess. *Int. J. Syst. Evol. Microbiol.* 55, 427–431.

Hammes, W.P., and Hertel, C. (2015). *Lactobacillus*. In Bergey's Manual of Systematics of Archaea and Bacteria, W.B. Whitman, F. Rainey, P. Kämpfer, M. Trujillo, J. Chun, P. DeVos, B. Hedlund, and S. Dedysh, eds. (Chichester, UK: John Wiley & Sons, Ltd), pp. 1–76.

Hauben, L., and Swings, J. (2015). *Erwinia*. In Bergey's Manual of Systematics of Archaea and Bacteria, W.B. Whitman, F. Rainey, P. Kämpfer, M. Trujillo, J. Chun, P. DeVos, B. Hedlund, and S. Dedysh, eds. (Chichester, UK: John Wiley & Sons, Ltd), pp. 1–19.

Hirakawa, M.P., Martinez, D.A., Sakthikumar, S., Anderson, M.Z., Berlin, A., Gujja, S., Zeng, Q., Zisson, E., Wang, J.M., Greenberg, J.M., et al. (2015). Genetic and phenotypic intra-species variation in *Candida albicans*. *Genome Res.* 25, 413–425.

Holdeman, L.V., and Moore, W.E.C. (1974). New Genus, *Coprococcus*, Twelve New Species, and Emended Descriptions of Four Previously Described Species of Bacteria from Human Feces. *Int. J. Syst. Bacteriol.* 24, 260–277.

Holzappel, W.H., Björkroth, J.A., and Dicks, L.M.T. (2015a). *Leuconostoc*. In Bergey's Manual of Systematics of Archaea and Bacteria, W.B. Whitman, F. Rainey, P. Kämpfer, M. Trujillo, J. Chun, P. DeVos, B. Hedlund, and S. Dedysh, eds. (Chichester, UK: John Wiley & Sons, Ltd), pp. 1–23.

Holzappel, W.H., Franz, C.M.A.P., Ludwig, W., and Dicks, L.M.T. (2015b). *Pediococcus*. In Bergey's Manual of Systematics of Archaea and Bacteria, W.B. Whitman, F. Rainey, P. Kämpfer, M. Trujillo, J. Chun, P. DeVos, B. Hedlund, and S. Dedysh, eds. (Chichester, UK: John Wiley & Sons, Ltd), pp. 1–15.

Hoyles, L., and McCartney, A.L. (2015). *Mobiluncus*. In Bergey's Manual of Systematics of Archaea and Bacteria, W.B. Whitman, F. Rainey, P. Kämpfer, M. Trujillo, J. Chun, P. DeVos, B. Hedlund, and S. Dedysh, eds. (Chichester, UK: John Wiley & Sons, Ltd), pp. 1–22.

Imhoff, J.F. (2015). *Rhodobacter*. In Bergey's Manual of Systematics of Archaea and Bacteria, W.B. Whitman, F. Rainey, P. Kämpfer, M. Trujillo, J. Chun, P. DeVos, B. Hedlund, and S. Dedysh, eds. (Chichester, UK: John Wiley & Sons, Ltd), pp. 1–12.

Ivanov, M.V., Lysenko, A.M., Petrunyaka, V.V., Ivanova, A.E., Nazina, T.N., Poltarau, A.B., Tourova, T.P., Belyaev, S.S., Grigoryan, A.A., Novikova, E.V., et al. (2001). Taxonomic study of aerobic thermophilic bacilli: descriptions of *Geobacillus subterraneus* gen. nov., sp. nov. and *Geobacillus uzenensis* sp. nov. from petroleum reservoirs and transfer of *Bacillus stearothermophilus*, *Bacillus thermocatenulatus*, *Bacillus thermoleovorans*, *Bacillus kaustophilus*, *Bacillus thermodenitrificans* to *Geobacillus* as the new combinations G. *stearothermophilus*, G. th. *Int. J. Syst. Evol. Microbiol.* 51, 433–446.

Jackson, F.L., and Goodman, Y.E. (1972). Transfer of the Facultatively Anaerobic Organism *Bacteroides corrodens* Eiken to a New Genus, *Eikenella*. *Int. J. Syst. Bacteriol.* 22, 73–77.

Jalava, J., and Eerola, E. (2015). *Filifactor*. In Bergey's Manual of Systematics of Archaea and Bacteria, W.B. Whitman, F. Rainey, P. Kämpfer, M. Trujillo, J. Chun, P. DeVos, B. Hedlund, and S. Dedysh, eds. (Chichester, UK: John Wiley & Sons, Ltd), pp. 1–5.

Jensen, P.R., Maldonado, L.A., and Goodfellow, M. (2015). *Salinispora*. In Bergey's Manual of Systematics of Archaea and Bacteria, W.B. Whitman, F. Rainey, P. Kämpfer, M. Trujillo, J. Chun, P. DeVos, B. Hedlund, and S. Dedysh, eds. (Chichester, UK: John Wiley & Sons, Ltd), pp. 1–10.

Johansen, J.E. (2005). *Luteibacter rhizovicinus* gen. nov., sp. nov., a yellow-pigmented gammaproteobacterium isolated from the rhizosphere of barley (*Hordeum vulgare* L.). *Int. J. Syst. Evol. Microbiol.* 55, 2285–2291.

Jones, A.L., and Goodfellow, M. (2015). *Rhodococcus*. In Bergey's Manual of Systematics of Archaea and Bacteria, W.B. Whitman, F. Rainey, P. Kämpfer, M. Trujillo, J. Chun, P. DeVos, B. Hedlund, and S. Dedysh, eds. (Chichester, UK: John Wiley & Sons, Ltd), pp. 1–50.

Jordan, D.C. (1982). NOTES: Transfer of *Rhizobium japonicum* Buchanan 1980 to *Bradyrhizobium* gen. nov., a Genus of Slow-Growing, Root Nodule Bacteria from Leguminous Plants. *Int. J. Syst. Bacteriol.* 32, 136–139.

Jumas-Bilak, E., Carlier, J.-P., Jean-Pierre, H., Citron, D., Bernard, K., Damay, A., Gay, B., Teyssier, C., Campos, J., and Marchandin, H. (2007). *Jonquetella anthropi* gen. nov., sp. nov., the first member of the candidate phylum "Synergistetes" isolated from man. *Int. J. Syst. Evol. Microbiol.* 57, 2743–2748.

Juni, E. (2015). *Psychrobacter*. In Bergey's Manual of Systematics of Archaea and Bacteria, W.B. Whitman, F. Rainey, P. Kämpfer, M. Trujillo, J. Chun, P. DeVos, B. Hedlund, and S. Dedysh, eds. (Chichester, UK: John Wiley & Sons, Ltd), pp. 1–10.

Juni, E., and Bøvre, K. (2015). *Moraxella*. In Bergey's Manual of Systematics of Archaea and Bacteria, W.B. Whitman, F. Rainey, P. Kämpfer, M. Trujillo, J. Chun, P. DeVos, B. Hedlund, and S. Dedysh, eds. (Chichester, UK: John Wiley & Sons, Ltd), pp. 1–17.

Kämpfer, P. (2015). *Streptomyces*. In Bergey's Manual of Systematics of Archaea and Bacteria, W.B. Whitman, F. Rainey, P. Kämpfer, M. Trujillo, J. Chun, P. DeVos, B. Hedlund, and S. Dedysh, eds. (Chichester, UK: John Wiley & Sons, Ltd), pp. 1–414.

Kämpfer, P., Glaeser, S.P., and Holmes, B. (2018). *Ochrobactrum*. In Bergey's Manual of Systematics of Archaea and Bacteria, W.B. Whitman, F. Rainey, P. Kämpfer, M. Trujillo, J. Chun, P. DeVos, B. Hedlund, and S. Dedysh, eds. (Chichester, UK: John Wiley & Sons, Ltd), pp. 1–25.

Kawamura, Y., Hou, X.-G., Sultana, F., Liu, S., Yamamoto, H., and Ezaki, T. (1995). Transfer of *Streptococcus adjacens* and *Streptococcus defectivus* to *Abiotrophia* gen. nov. as *Abiotrophia adiacens* comb. nov. and *Abiotrophia defectiva* comb. nov., Respectively. *Int. J. Syst. Bacteriol.* *45*, 798–803.

Kilian, M. (2015). *Haemophilus*. In Bergey's Manual of Systematics of Archaea and Bacteria, W.B. Whitman, F. Rainey, P. Kämpfer, M. Trujillo, J. Chun, P. DeVos, B. Hedlund, and S. Dedysh, eds. (Chichester, UK: John Wiley & Sons, Ltd), pp. 1–47.

Kim, S.B., and Goodfellow, M. (2015). *Saccharopolyspora*. In Bergey's Manual of Systematics of Archaea and Bacteria, W.B. Whitman, F. Rainey, P. Kämpfer, M. Trujillo, J. Chun, P. DeVos, B. Hedlund, and S. Dedysh, eds. (Chichester, UK: John Wiley & Sons, Ltd), pp. 1–30.

Koch, C., Schumann, P., and Stackebrandt, E. (1995). Reclassification of *Micrococcus agilis* (Ali-Cohen 1889) to the Genus *Arthrobacter* as *Arthrobacter agilis* comb. nov. and Emendation of the Genus *Arthrobacter*. *Int. J. Syst. Bacteriol.* *45*, 837–839.

Kuever, J., Rainey, F.A., and Widdel, F. (2015). *Desulfobulbus*. In Bergey's Manual of Systematics of Archaea and Bacteria, W.B. Whitman, F. Rainey, P. Kämpfer, M. Trujillo, J. Chun, P. DeVos, B. Hedlund, and S. Dedysh, eds. (Chichester, UK: John Wiley & Sons, Ltd), pp. 1–6.

Kuykendall, L.D., Young, J.M., Martínez-Romero, E., Kerr, A., and Sawada, H. (2015). *Rhizobium*. In Bergey's Manual of Systematics of Archaea and Bacteria, W.B. Whitman, F. Rainey, P. Kämpfer, M. Trujillo, J. Chun, P. DeVos, B. Hedlund, and S. Dedysh, eds. (Chichester, UK: John Wiley & Sons, Ltd), pp. 1–36.

Langendijk, P.S., Kulik, E.M., Sandmeier, H., Meyer, J., and van der Hoeven, J.S. (2001). Isolation of *Desulfomicrobium orale* sp. nov. and *Desulfovibrio* strain NY682, oral sulfate-reducing bacteria involved in human periodontal disease. *Int. J. Syst. Evol. Microbiol.* *51*, 1035–1044.

Lawson, P.A. (2015). *Granulicatella*. In Bergey's Manual of Systematics of Archaea and Bacteria, W.B. Whitman, F. Rainey, P. Kämpfer, M. Trujillo, J. Chun, P. DeVos, B. Hedlund, and S. Dedysh, eds. (Chichester, UK: John Wiley & Sons, Ltd), pp. 1–9.

Logan, N.A., and Vos, P.D. (2015). *Bacillus*. In Bergey's Manual of Systematics of Archaea and Bacteria, W.B. Whitman, F. Rainey, P. Kämpfer, M. Trujillo, J. Chun, P. DeVos, B. Hedlund, and S. Dedysh, eds. (Chichester, UK: John Wiley & Sons, Ltd), pp. 1–163.

London, J., Celesk, R.A., Kagermeier, A., and Johnson, J.L. (1985). Emended Description of *Capnocytophaga gingivalis*. *Int. J. Syst. Bacteriol.* 35, 369–370.

Magee, J.G., and Ward, A.C. (2015). *Mycobacterium*. In *Bergey's Manual of Systematics of Archaea and Bacteria*, W.B. Whitman, F. Rainey, P. Kämpfer, M. Trujillo, J. Chun, P. DeVos, B. Hedlund, and S. Dedysh, eds. (Chichester, UK: John Wiley & Sons, Ltd), pp. 1–84.

Marchandin, H., Juvonen, R., and Haikara, A. (2015). *Megasphaera*. In *Bergey's Manual of Systematics of Archaea and Bacteria*, W.B. Whitman, F. Rainey, P. Kämpfer, M. Trujillo, J. Chun, P. DeVos, B. Hedlund, and S. Dedysh, eds. (Chichester, UK: John Wiley & Sons, Ltd), pp. 1–16.

Matthies, C., Evers, S., Ludwig, W., and Schink, B. (2000). *Anaerovorax odorimutans* gen. nov., sp. nov., a putrescine-fermenting, strictly anaerobic bacterium. *Int. J. Syst. Evol. Microbiol.* 50, 1591–1594.

Mechichi, T., and Patel, B.K.C. (2015). *Sporobacterium*. In *Bergey's Manual of Systematics of Archaea and Bacteria*, W.B. Whitman, F. Rainey, P. Kämpfer, M. Trujillo, J. Chun, P. DeVos, B. Hedlund, and S. Dedysh, eds. (Chichester, UK: John Wiley & Sons, Ltd), pp. 1–5.

Moore, L.V.H., and Moore, W.E.C. (1994). *Oribaculum catoniae* gen. nov., sp. nov.; *Catonella morbi* gen. nov., sp. nov.; *Hallella seregens* gen. nov., sp. nov.; *Johnsonella ignava* gen. nov., sp. nov.; and *Dialister pneumosintes* gen. nov., comb. nov., nom. rev., Anaerobic Gram-Negative Bacilli from the Human Gingival Crevice. *Int. J. Syst. Bacteriol.* 44, 187–192.

Morita, H., Shiratori, C., Murakami, M., Takami, H., Toh, H., Kato, Y., Nakajima, F., Takagi, M., Akita, H., Masaoka, T., et al. (2008). *Sharpea azabuensis* gen. nov., sp. nov., a Gram-positive, strictly anaerobic bacterium isolated from the faeces of thoroughbred horses. *Int. J. Syst. Evol. Microbiol.* 58, 2682–2686.

Nobre, M.F., Truper, H.G., and Da Costa, M.S. (1996). Transfer of *Thermus ruber* (Loginova et al. 1984), *Thermus silvanus* (Tenreiro et al. 1995), and *Thermus chliarophilus* (Tenreiro et al. 1995) to *Meiothermus* gen. nov. as *Meiothermus ruber* comb. nov., *Meiothermus silvanus* comb. nov., and *Meiothermus chliarophilus* comb. nov., Respectively, and Emendation of the Genus *Thermus*. *Int. J. Syst. Bacteriol.* 46, 604–606.

Normand, P., and Benson, D.R. (2015). *Modestobacter*. In *Bergey's Manual of Systematics of Archaea and Bacteria*, W.B. Whitman, F. Rainey, P. Kämpfer, M. Trujillo, J. Chun, P. DeVos, B. Hedlund, and S. Dedysh, eds. (Chichester, UK: John Wiley & Sons, Ltd), pp. 1–4.

Norris, S.J., Paster, B.J., and Smibert, R.M. (2015). *Treponema*. In *Bergey's Manual of Systematics of Archaea and Bacteria*, W.B. Whitman, F. Rainey, P. Kämpfer, M. Trujillo, J. Chun, P. DeVos, B. Hedlund, and S. Dedysh, eds. (Chichester, UK: John Wiley & Sons, Ltd), pp. 1–42.

Norskov-Lauritsen, N. (2006). Reclassification of *Actinobacillus actinomycetemcomitans*, *Haemophilus aphrophilus*, *Haemophilus paraphrophilus* and *Haemophilus segnis* as *Aggregatibacter actinomycetemcomitans* gen. nov., comb. nov., *Aggregatibacter aphrophilus* comb. nov. and *Aggregatibacter segnis* comb. nov., and emended description of



*Aggregatibacter aphrophilus* to include V factor-dependent and V factor-independent isolates. *Int. J. Syst. Evol. Microbiol.* 56, 2135–2146.

Olsen, I., and Møller, K. (2015). *Actinobacillus*. In *Bergey's Manual of Systematics of Archaea and Bacteria*, W.B. Whitman, F. Rainey, P. Kämpfer, M. Trujillo, J. Chun, P. DeVos, B. Hedlund, and S. Dedysh, eds. (Chichester, UK: John Wiley & Sons, Ltd), pp. 1–36.

Palleroni, N.J. (2015a). *Pseudomonas*. In *Bergey's Manual of Systematics of Archaea and Bacteria*, W.B. Whitman, F. Rainey, P. Kämpfer, M. Trujillo, J. Chun, P. DeVos, B. Hedlund, and S. Dedysh, eds. (Chichester, UK: John Wiley & Sons, Ltd), pp. 1–1.

Palleroni, N.J. (2015b). *Stenotrophomonas*. In *Bergey's Manual of Systematics of Archaea and Bacteria*, W.B. Whitman, F. Rainey, P. Kämpfer, M. Trujillo, J. Chun, P. DeVos, B. Hedlund, and S. Dedysh, eds. (Chichester, UK: John Wiley & Sons, Ltd), pp. 1–20.

Paster, B.J., and Dewhirst, F.E. (2015). *Cardiobacterium*. In *Bergey's Manual of Systematics of Archaea and Bacteria*, W.B. Whitman, F. Rainey, P. Kämpfer, M. Trujillo, J. Chun, P. DeVos, B. Hedlund, and S. Dedysh, eds. (Chichester, UK: John Wiley & Sons, Ltd), pp. 1–6.

Patrick, S., and McDowell, A. (2015). *Propionibacterium*. In *Bergey's Manual of Systematics of Archaea and Bacteria*, W.B. Whitman, F. Rainey, P. Kämpfer, M. Trujillo, J. Chun, P. DeVos, B. Hedlund, and S. Dedysh, eds. (Chichester, UK: John Wiley & Sons, Ltd), pp. 1–29.

Pikuta, E. (2003). Aerobic growth of *Anoxybacillus pushchinoensis* K1T: emended descriptions of *A. pushchinoensis* and the genus *Anoxybacillus*. *Int. J. Syst. Evol. Microbiol.* 53, 1561–1562.

Priest, F.G. (2015). *Paenibacillus*. In *Bergey's Manual of Systematics of Archaea and Bacteria*, W.B. Whitman, F. Rainey, P. Kämpfer, M. Trujillo, J. Chun, P. DeVos, B. Hedlund, and S. Dedysh, eds. (Chichester, UK: John Wiley & Sons, Ltd), pp. 1–40.

Rainey, F.A. (2015). *Schwartzia*. In *Bergey's Manual of Systematics of Archaea and Bacteria*, W.B. Whitman, F. Rainey, P. Kämpfer, M. Trujillo, J. Chun, P. DeVos, B. Hedlund, and S. Dedysh, eds. (Chichester, UK: John Wiley & Sons, Ltd), pp. 1–3.

Rainey, F.A., Donnison, A.M., Janssen, P.H., Saul, D., Rodrigo, A., Bergquist, P.L., Daniel, R.M., Stackebrandt, E., and Morgan, H.W. (1994). Description of *Caldicellulosiruptor saccharolyticus* gen. nov., sp. nov.: an obligately anaerobic, extremely thermophilic, cellulolytic bacterium. *FEMS Microbiol. Lett.* 120, 263–266.

Rainey, F.A., Hollen, B.J., and Small, A.M. (2015). *Clostridium*. In *Bergey's Manual of Systematics of Archaea and Bacteria*, W.B. Whitman, F. Rainey, P. Kämpfer, M. Trujillo, J. Chun, P. DeVos, B. Hedlund, and S. Dedysh, eds. (Chichester, UK: John Wiley & Sons, Ltd), pp. 1–122.

Ritalahti, K.M., Justicia-Leon, S.D., Cusick, K.D., Ramos-Hernandez, N., Rubin, M., Dombush, J., and Löffler, F.E. (2012). *Sphaerochaeta globosa* gen. nov., sp. nov. and *Sphaerochaeta pleomorpha* sp. nov., free-living, spherical spirochaetes. *Int. J. Syst. Evol. Microbiol.* 62, 210–216.

Robertson, J.A., Taylor-Robinson, D., May, M., and Brown, D.R. (2018). *Ureaplasma*. In Bergey's Manual of Systematics of Archaea and Bacteria, W.B. Whitman, F. Rainey, P. Kämpfer, M. Trujillo, J. Chun, P. DeVos, B. Hedlund, and S. Dedysh, eds. (Chichester, UK: John Wiley & Sons, Ltd), pp. 1–18.

Sakamoto, M., Tanner, A.C.R., and Benno, Y. (2015). *Tannerella*. In Bergey's Manual of Systematics of Archaea and Bacteria, W.B. Whitman, F. Rainey, P. Kämpfer, M. Trujillo, J. Chun, P. DeVos, B. Hedlund, and S. Dedysh, eds. (Chichester, UK: John Wiley & Sons, Ltd), pp. 1–9.

Sawada, H., Ieki, H., Oyaizu, H., and Matsumoto, S. (1993). Proposal for Rejection of *Agrobacterium tumefaciens* and Revised Descriptions for the Genus *Agrobacterium* and for *Agrobacterium radiobacter* and *Agrobacterium rhizogenes*. *Int. J. Syst. Bacteriol.* 43, 694–702.

Schleifer, K.-H. (2015). *Macrococcus*. In Bergey's Manual of Systematics of Archaea and Bacteria, W.B. Whitman, F. Rainey, P. Kämpfer, M. Trujillo, J. Chun, P. DeVos, B. Hedlund, and S. Dedysh, eds. (Chichester, UK: John Wiley & Sons, Ltd), pp. 1–6.

Schleifer, K.-H., and Bell, J.A. (2015). *Staphylococcus*. In Bergey's Manual of Systematics of Archaea and Bacteria, W.B. Whitman, F. Rainey, P. Kämpfer, M. Trujillo, J. Chun, P. DeVos, B. Hedlund, and S. Dedysh, eds. (Chichester, UK: John Wiley & Sons, Ltd), pp. 1–43.

Schleifer, K.H., and Kilpper-Balz, R. (1984). Transfer of *Streptococcus faecalis* and *Streptococcus faecium* to the Genus *Enterococcus* nom. rev. as *Enterococcus faecalis* comb. nov. and *Enterococcus faecium* comb. nov. *Int. J. Syst. Bacteriol.* 34, 31–34.

Shah, H.N., Chattaway, M.A., Rajakurana, L., and Gharbia, S.E. (2015). *Prevotella*. In Bergey's Manual of Systematics of Archaea and Bacteria, W.B. Whitman, F. Rainey, P. Kämpfer, M. Trujillo, J. Chun, P. DeVos, B. Hedlund, and S. Dedysh, eds. (Chichester, UK: John Wiley & Sons, Ltd), pp. 1–25.

Shouche, Y.S., Dighe, A.S., Dhotre, D.P., Patole, M.S., and Ranade, D.R. (2015). *Selenomonas*. In Bergey's Manual of Systematics of Archaea and Bacteria, W.B. Whitman, F. Rainey, P. Kämpfer, M. Trujillo, J. Chun, P. DeVos, B. Hedlund, and S. Dedysh, eds. (Chichester, UK: John Wiley & Sons, Ltd), pp. 1–12.

van Spanning, R.J.M., Stouthamer, A.H., Baker, S.C., and van Verseveld, H.W. (2015). *Paracoccus*. In Bergey's Manual of Systematics of Archaea and Bacteria, W.B. Whitman, F. Rainey, P. Kämpfer, M. Trujillo, J. Chun, P. DeVos, B. Hedlund, and S. Dedysh, eds. (Chichester, UK: John Wiley & Sons, Ltd), pp. 1–14.

Stackebrandt, E. (2015). *Nesterenkonia*. In Bergey's Manual of Systematics of Archaea and Bacteria, W.B. Whitman, F. Rainey, P. Kämpfer, M. Trujillo, J. Chun, P. DeVos, B. Hedlund, and S. Dedysh, eds. (Chichester, UK: John Wiley & Sons, Ltd), pp. 1–12.

Stackebrandt, E., Koch, C., Gvozdiak, O., and Schumann, P. (1995). Taxonomic Dissection of the Genus *Micrococcus*: *Kocuria* gen. nov., *Nesterenkonia* gen. nov., *Kytococcus* gen. nov., *Dermacoccus* gen. nov., and *Micrococcus* Cohn 1872 gen. emend. *Int. J. Syst. Bacteriol.* 45, 682–692.

Staley, J.T., Irgens, R.L., and Brenner, D.J. (1987). *Enhydrobacter aerosaccus* gen. nov., sp. nov., a Gas-Vacuolated, Facultatively Anaerobic, Heterotrophic Rod. *Int. J. Syst. Bacteriol.* 37, 289–291.

Summanen, P., and Finegold, S.M. (2015). *Porphyromonas*. In *Bergey's Manual of Systematics of Archaea and Bacteria*, W.B. Whitman, F. Rainey, P. Kämpfer, M. Trujillo, J. Chun, P. DeVos, B. Hedlund, and S. Dedysh, eds. (Chichester, UK: John Wiley & Sons, Ltd), pp. 1–14.

Suzuki, K.-I., and Hamada, M. (2015). *Microbacterium*. In *Bergey's Manual of Systematics of Archaea and Bacteria*, W.B. Whitman, F. Rainey, P. Kämpfer, M. Trujillo, J. Chun, P. DeVos, B. Hedlund, and S. Dedysh, eds. (Chichester, UK: John Wiley & Sons, Ltd), pp. 1–52.

Teuber, M. (2015). *Lactococcus*. In *Bergey's Manual of Systematics of Archaea and Bacteria*, W.B. Whitman, F. Rainey, P. Kämpfer, M. Trujillo, J. Chun, P. DeVos, B. Hedlund, and S. Dedysh, eds. (Chichester, UK: John Wiley & Sons, Ltd), pp. 1–21.

The Editorial Board (2015a). *Mogibacterium*. In *Bergey's Manual of Systematics of Archaea and Bacteria*, W.B. Whitman, F. Rainey, P. Kämpfer, M. Trujillo, J. Chun, P. DeVos, B. Hedlund, and S. Dedysh, eds. (Chichester, UK: John Wiley & Sons, Ltd), pp. 1–5.

The Editorial Board (2015b). *Parvimonas*. In *Bergey's Manual of Systematics of Archaea and Bacteria*, W.B. Whitman, F. Rainey, P. Kämpfer, M. Trujillo, J. Chun, P. DeVos, B. Hedlund, and S. Dedysh, eds. (Chichester, UK: John Wiley & Sons, Ltd), pp. 1–4.

The Editorial Board (2015c). *Propionivibrio*. In *Bergey's Manual of Systematics of Archaea and Bacteria*, W.B. Whitman, F. Rainey, P. Kämpfer, M. Trujillo, J. Chun, P. DeVos, B. Hedlund, and S. Dedysh, eds. (Chichester, UK: John Wiley & Sons, Ltd), pp. 1–2.

Tønnum, T. (2015). *Neisseria*. In *Bergey's Manual of Systematics of Archaea and Bacteria*, W.B. Whitman, F. Rainey, P. Kämpfer, M. Trujillo, J. Chun, P. DeVos, B. Hedlund, and S. Dedysh, eds. (Chichester, UK: John Wiley & Sons, Ltd), pp. 1–48.

Trujillo, M.E., and Goodfellow, M. (2015). *Brevibacterium*. In *Bergey's Manual of Systematics of Archaea and Bacteria*, W.B. Whitman, F. Rainey, P. Kämpfer, M. Trujillo, J. Chun, P. DeVos, B. Hedlund, and S. Dedysh, eds. (Chichester, UK: John Wiley & Sons, Ltd), pp. 1–22.

Ueki, A. (2006). *Paludibacter propionicigenes* gen. nov., sp. nov., a novel strictly anaerobic, Gram-negative, propionate-producing bacterium isolated from plant residue in irrigated rice-field soil in Japan. *Int. J. Syst. Evol. Microbiol.* 56, 39–44.

Wade, W.G., and Dewhirst, F.E. (2015). *Slackia*. In *Bergey's Manual of Systematics of Archaea and Bacteria*, W.B. Whitman, F. Rainey, P. Kämpfer, M. Trujillo, J. Chun, P. DeVos, B. Hedlund, and S. Dedysh, eds. (Chichester, UK: John Wiley & Sons, Ltd), pp. 1–5.

Wade, W.G., and Downes, J. (2015). *Shuttleworthia*. In *Bergey's Manual of Systematics of Archaea and Bacteria*, W.B. Whitman, F. Rainey, P. Kämpfer, M. Trujillo, J. Chun, P. DeVos, B. Hedlund, and S. Dedysh, eds. (Chichester, UK: John Wiley & Sons, Ltd), pp. 1–3.

Wen, A., Fegan, M., Hayward, C., Chakraborty, S., and Sly, L.I. (1999). Phylogenetic relationships among members of the Comamonadaceae, and description of *Delftia acidovorans*

(den Dooren de Jong 1926 and Tamaoka et al. 1987) gen. nov., comb. nov. *Int. J. Syst. Bacteriol.* 49, 567–576.

Weyant, R.S. (2015). *Kingella*. In *Bergey's Manual of Systematics of Archaea and Bacteria*, W.B. Whitman, F. Rainey, P. Kämpfer, M. Trujillo, J. Chun, P. DeVos, B. Hedlund, and S. Dedysh, eds. (Chichester, UK: John Wiley & Sons, Ltd), pp. 1–8.

Weyant, R.S., and Whitney, A.M. (2015). *Roseomonas*. In *Bergey's Manual of Systematics of Archaea and Bacteria*, W.B. Whitman, F. Rainey, P. Kämpfer, M. Trujillo, J. Chun, P. DeVos, B. Hedlund, and S. Dedysh, eds. (Chichester, UK: John Wiley & Sons, Ltd), pp. 1–9.

Whiley, R.A., and Hardie, J.M. (2015). *Streptococcus*. In *Bergey's Manual of Systematics of Archaea and Bacteria*, W.B. Whitman, F. Rainey, P. Kämpfer, M. Trujillo, J. Chun, P. DeVos, B. Hedlund, and S. Dedysh, eds. (Chichester, UK: John Wiley & Sons, Ltd), pp. 1–86.

Willems, A., and Collins, M.D. (2015a). *Butyrivibrio*. In *Bergey's Manual of Systematics of Archaea and Bacteria*, W.B. Whitman, F. Rainey, P. Kämpfer, M. Trujillo, J. Chun, P. DeVos, B. Hedlund, and S. Dedysh, eds. (Chichester, UK: John Wiley & Sons, Ltd), pp. 1–20.

Willems, A., and Collins, M.D. (2015b). *Pseudoramibacter*. In *Bergey's Manual of Systematics of Archaea and Bacteria*, W.B. Whitman, F. Rainey, P. Kämpfer, M. Trujillo, J. Chun, P. DeVos, B. Hedlund, and S. Dedysh, eds. (Chichester, UK: John Wiley & Sons, Ltd), pp. 1–8.

Willems, A., Mergaert, J., and Swings, J. (2015). *Variovorax*. In *Bergey's Manual of Systematics of Archaea and Bacteria*, W.B. Whitman, F. Rainey, P. Kämpfer, M. Trujillo, J. Chun, P. DeVos, B. Hedlund, and S. Dedysh, eds. (Chichester, UK: John Wiley & Sons, Ltd), pp. 1–9.

Xie, C.-H., and Yokota, A. (2005). Phylogenetic analysis of *Alysiella* and related genera of Neisseriaceae: Proposal of *Alysiella crassa* comb. nov., *Conchiformibium steedae* gen. nov., comb. nov., *Conchiformibium kuhniae* sp. nov. and *Bergeriella denitrificans* gen. nov., comb. nov. *J. Gen. Appl. Microbiol.* 51, 1–10.

Yabuuchi, E., and Kosako, Y. (2015). *Sphingomonas*. In *Bergey's Manual of Systematics of Archaea and Bacteria*, W.B. Whitman, F. Rainey, P. Kämpfer, M. Trujillo, J. Chun, P. DeVos, B. Hedlund, and S. Dedysh, eds. (Chichester, UK: John Wiley & Sons, Ltd), pp. 1–39.

Yabuuchi, E., Kawamura, Y., and Ezaki, T. (2015). *Ralstonia*. In *Bergey's Manual of Systematics of Archaea and Bacteria*, W.B. Whitman, F. Rainey, P. Kämpfer, M. Trujillo, J. Chun, P. DeVos, B. Hedlund, and S. Dedysh, eds. (Chichester, UK: John Wiley & Sons, Ltd), pp. 1–21.

Yamada, K., and Komagata, K. (1972). TAXONOMIC STUDIES ON CORYNEFORM BACTERIA. *J. Gen. Appl. Microbiol.* 18, 417–431.

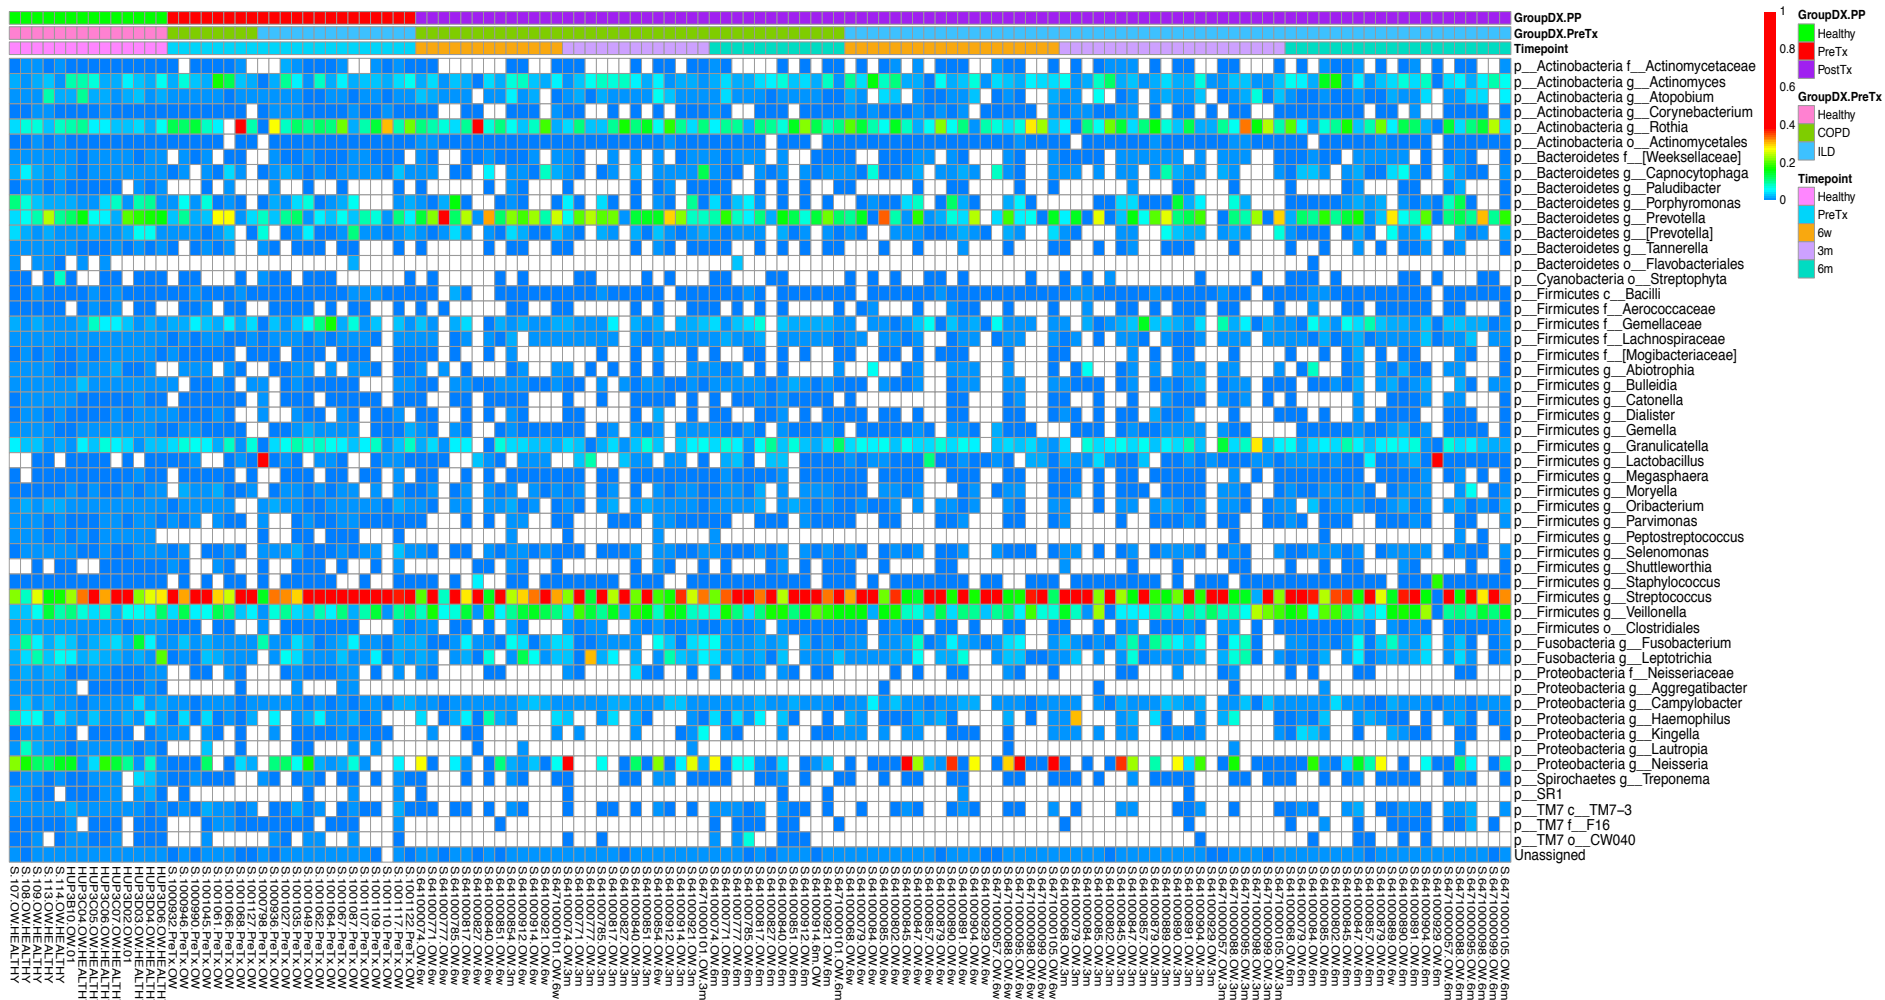

**Figure E1. Bacterial composition based on 16S rRNA gene sequences in oral microbiome samples.** The heatmap shows oral samples in columns and bacterial taxa in rows. The first three rows indicate sample type. The first row shows disease groups (Healthy in green, Pre-Tx in red, and Post-Tx in purple). The second row corresponds to diagnosis groups (Healthy in pink, COPD in green, and ILD in blue), and third row by time point (Healthy in pink, Pre-Tx in blue, Post-Tx six weeks in orange, three months in purple and six months in turquoise). Relative abundance of indicated taxa within each sample is colored from blue to red, from 0 to 1 bacterial proportion per sample. White indicates absence of these taxa within the sample.

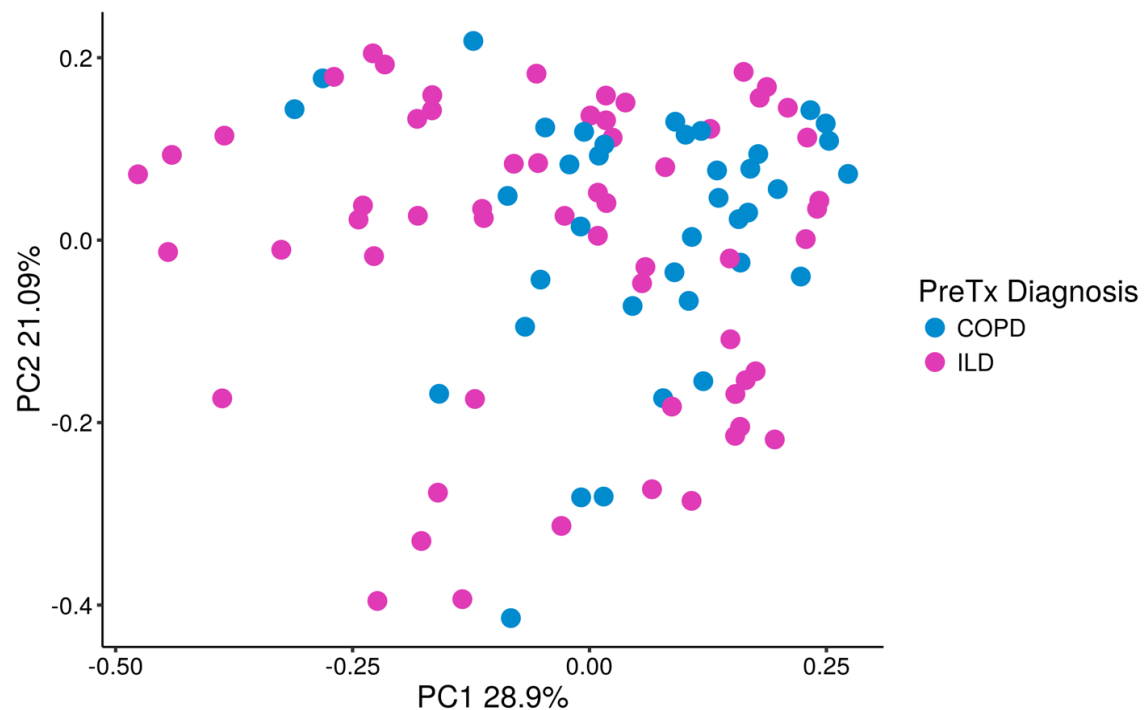

**Figure E2. Distribution of the oropharyngeal microbiome among lung diagnosis groups.** PCoA showing sample distribution based on lung disease group; Pre-Tx are based on disease and Post-Tx are based on disease indication for lung transplantations. Colors indicate COPD (red) or ILD (blue). No significant differences based on diagnosis were seen.

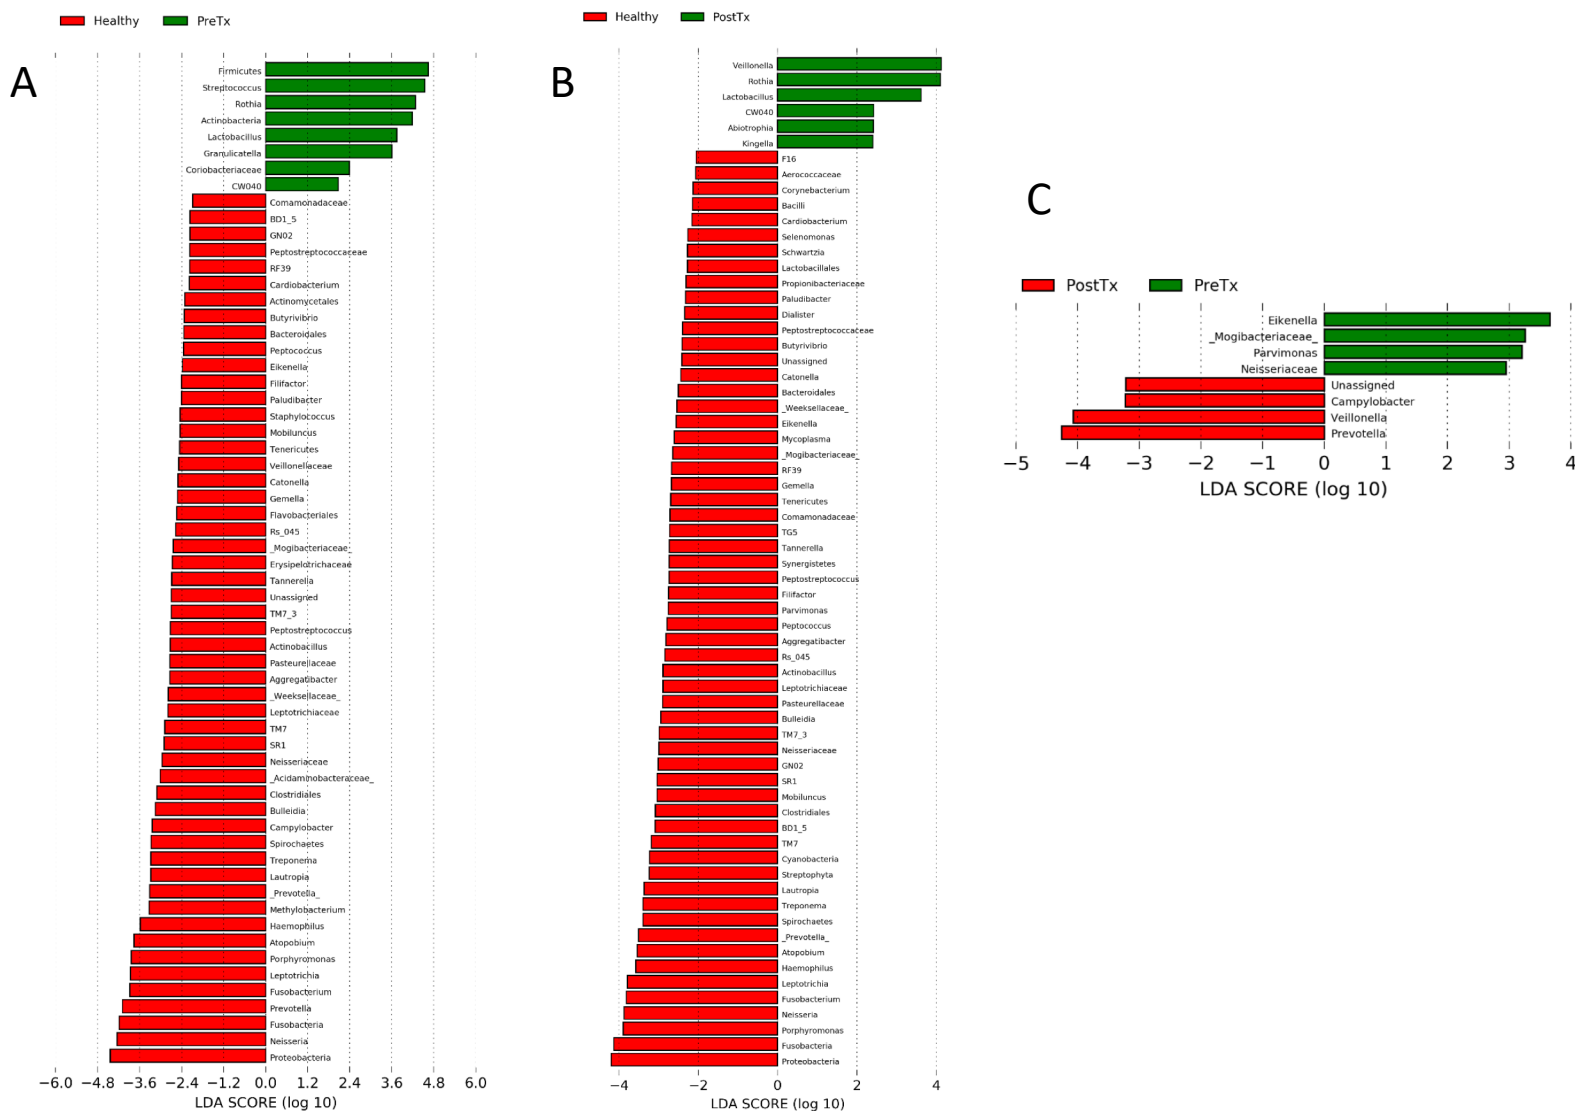

**Figure E3. Linear Discriminant Analysis Effect Size (LEfSe) analysis of bacterial taxa associated with disease groups.** Specific enriched taxa are indicated for (A) Pre-Tx compared to healthy communities; (B) Post-Tx compared to healthy communities, and; (C) Post-Tx compared to Pre-Tx communities. For analysis, Post-Tx time points were grouped together.

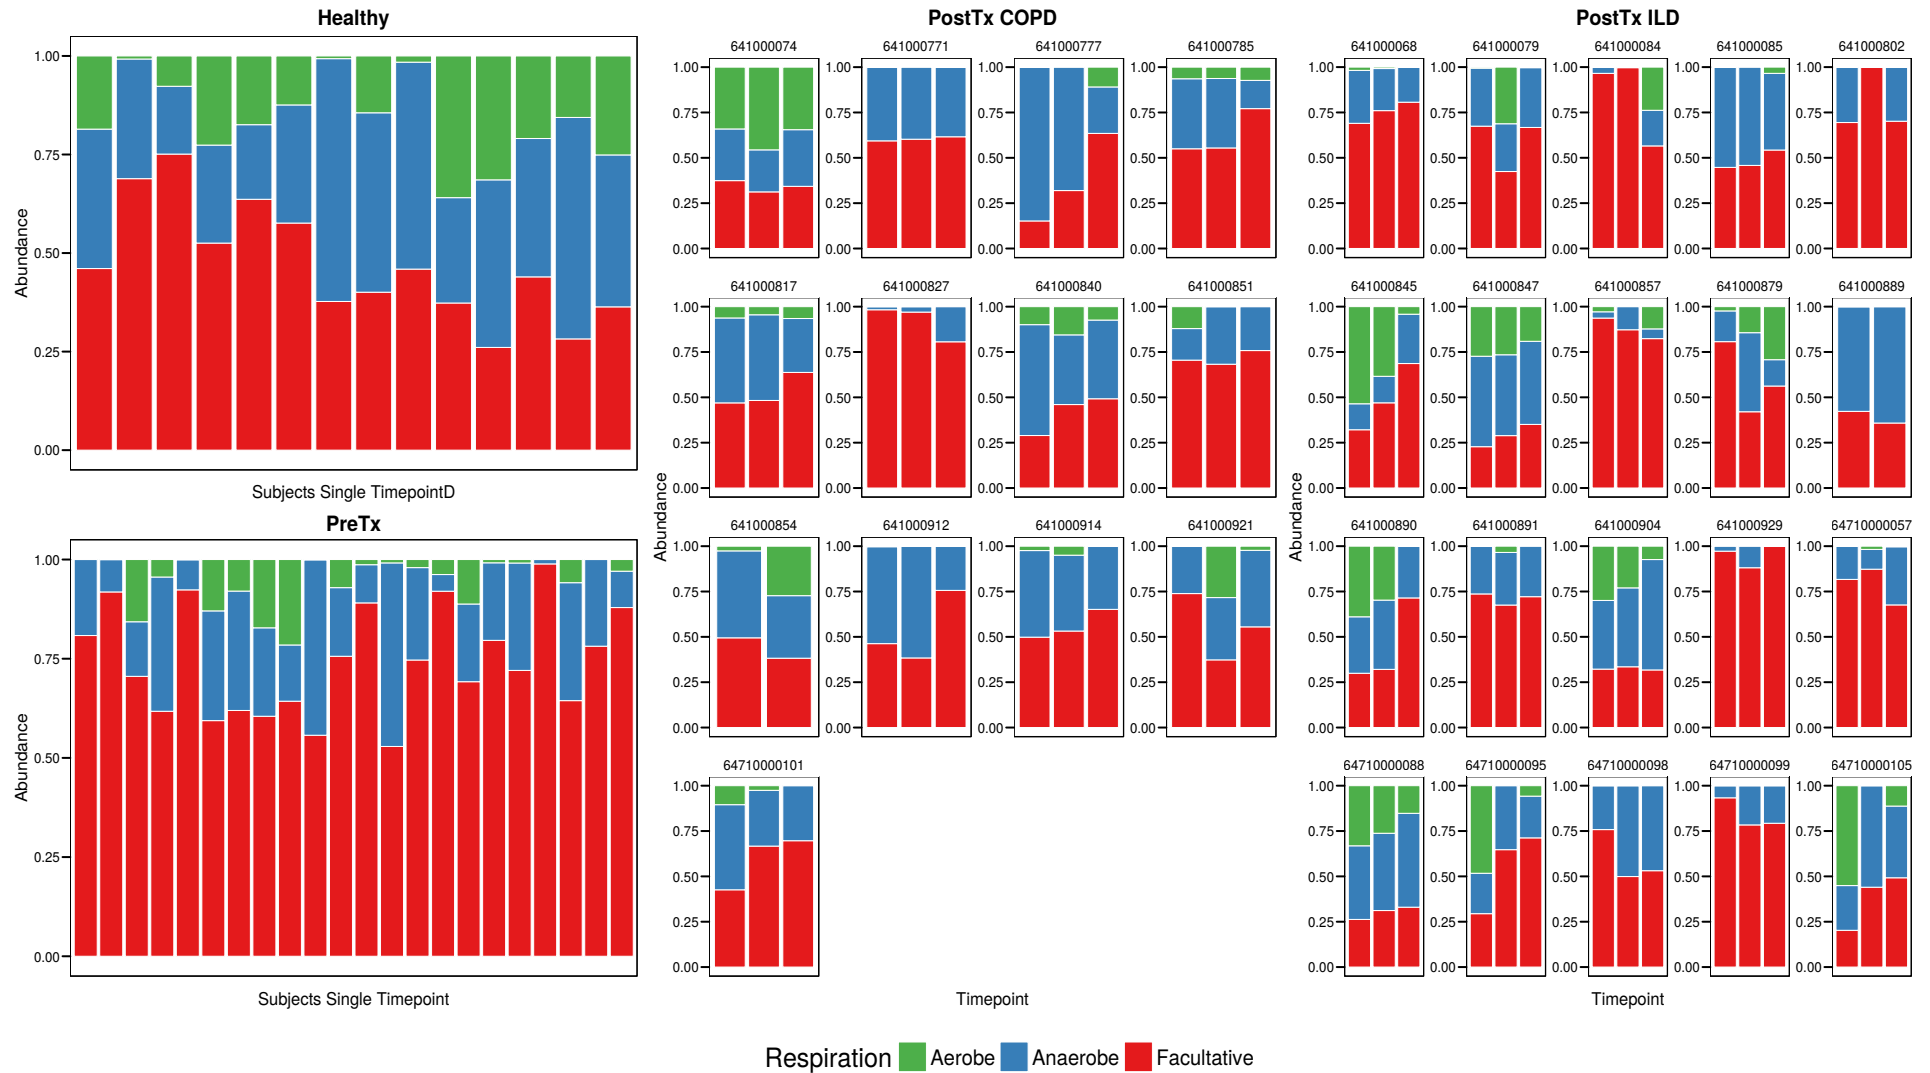

**Figure E4. Bacterial respiration phenotype dynamics over time.** Stacked bar graphs indicate the proportion of strict aerobic (green), obligate anaerobic (blue) and facultative anaerobic bacteria (red) within each sample. Samples are separated by disease group, diagnosis and time point. Single time points were evaluated for healthy and Pre-Tx groups; longitudinal samples are grouped by subject for the Post-Tx group (6 weeks, 3 months and 6 months).



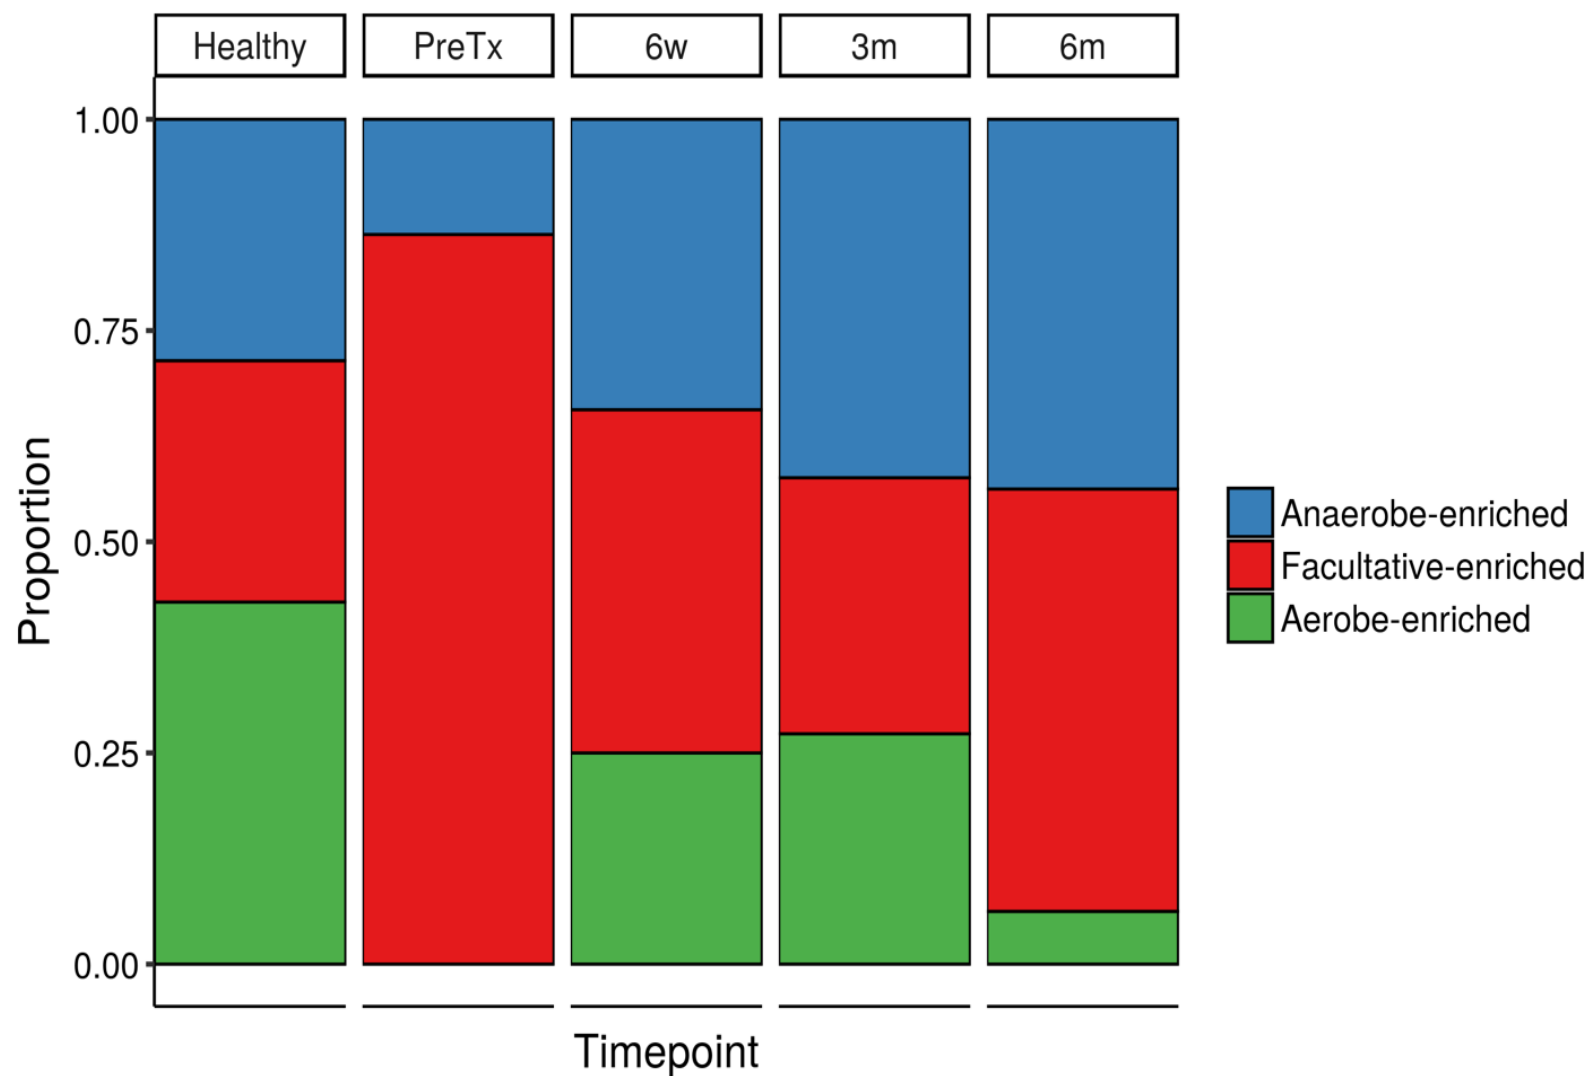

**Figure E5. Bacterial respiration phenotype groups in oral samples.** Partitioning around medoids (PAM) was applied to identify phenotype groups, with the number of clusters estimated by maximum average silhouette width. Clustering identified Anaerobe-enriched, Facultative-enriched, and Aerobe-enriched clusters, and the proportion of each is shown by timepoint.

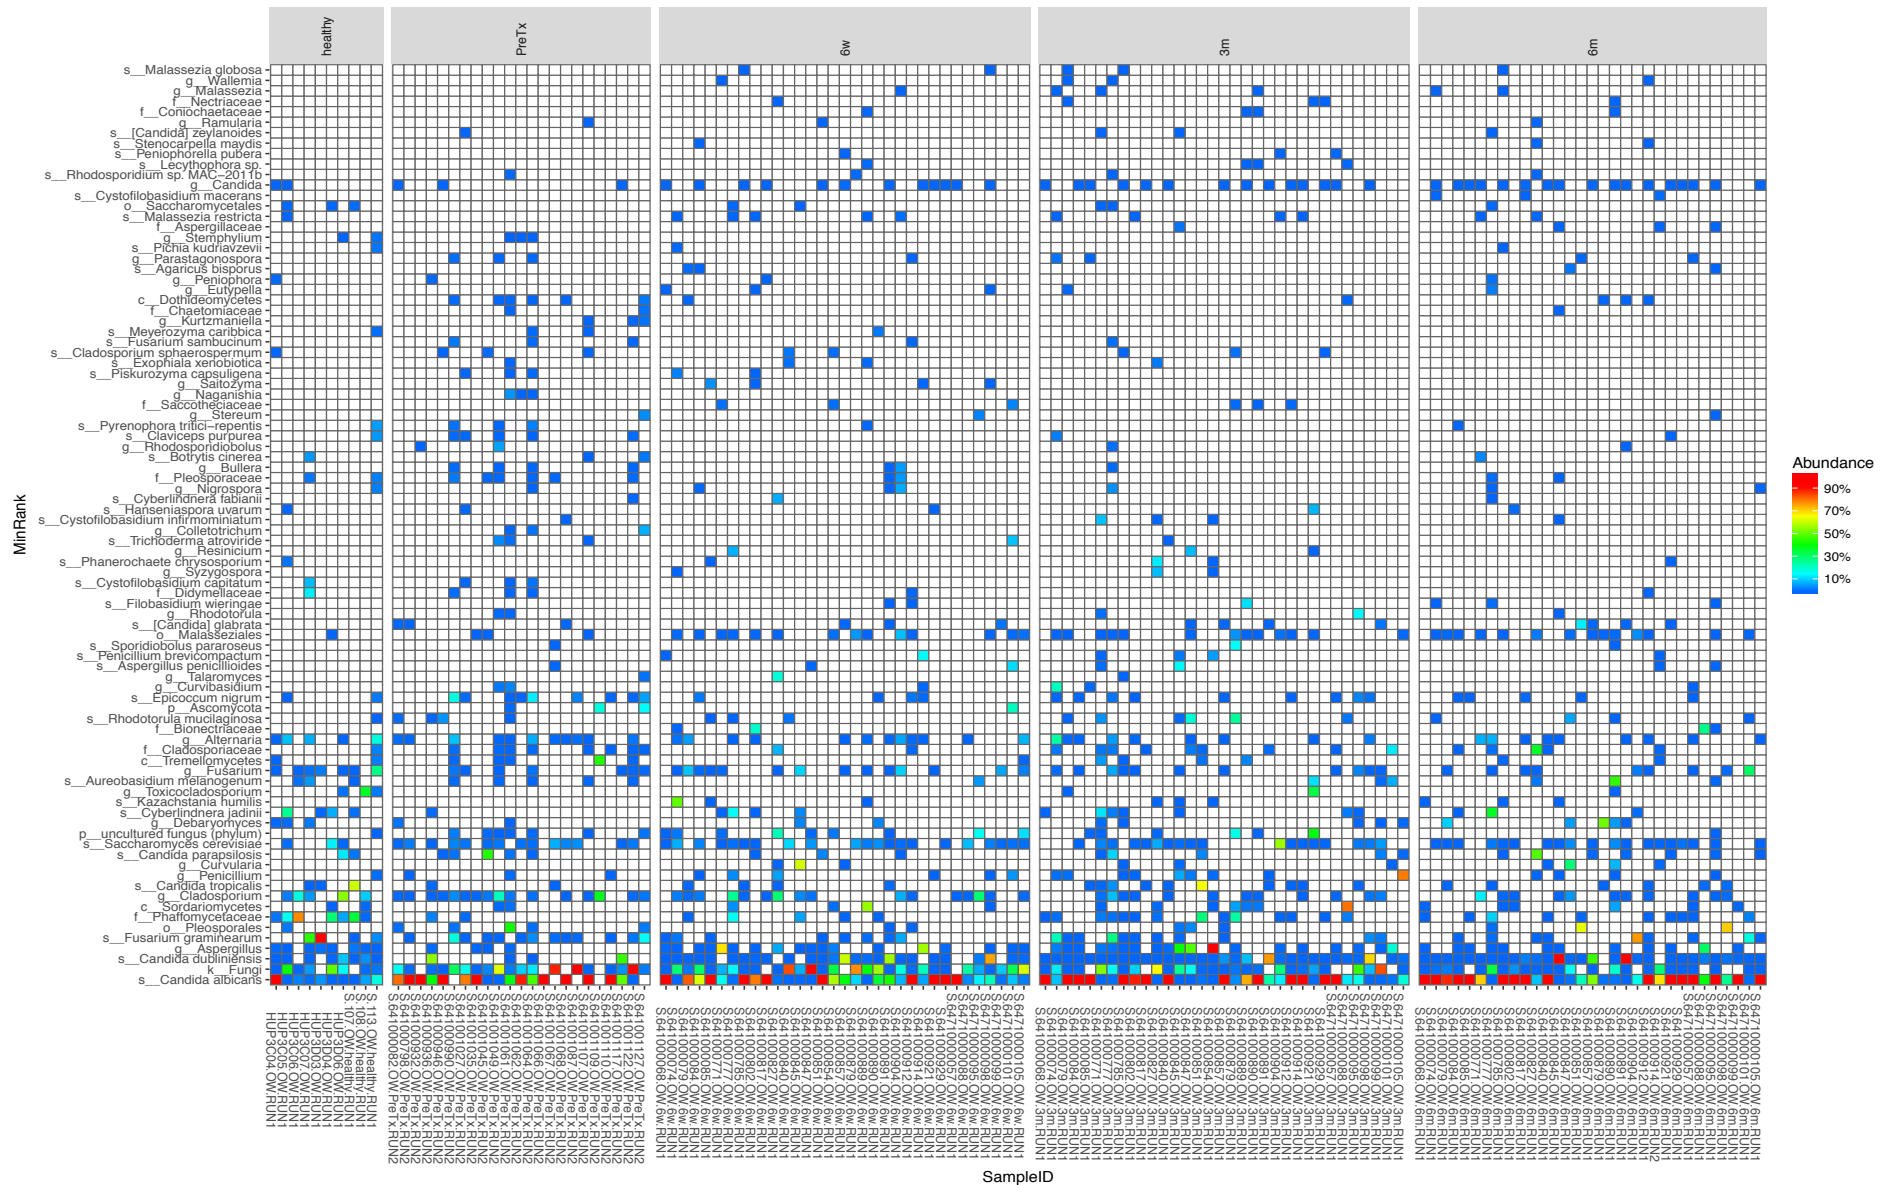

**Figure E6. Fungal composition in oropharyngeal samples based on ITS rRNA gene sequences.** The heat map shows relative abundances of the fungal taxa. Healthy and pre-transplantation have a single timepoint, longitudinal samples for post-transplant subjects are grouped by timepoint.

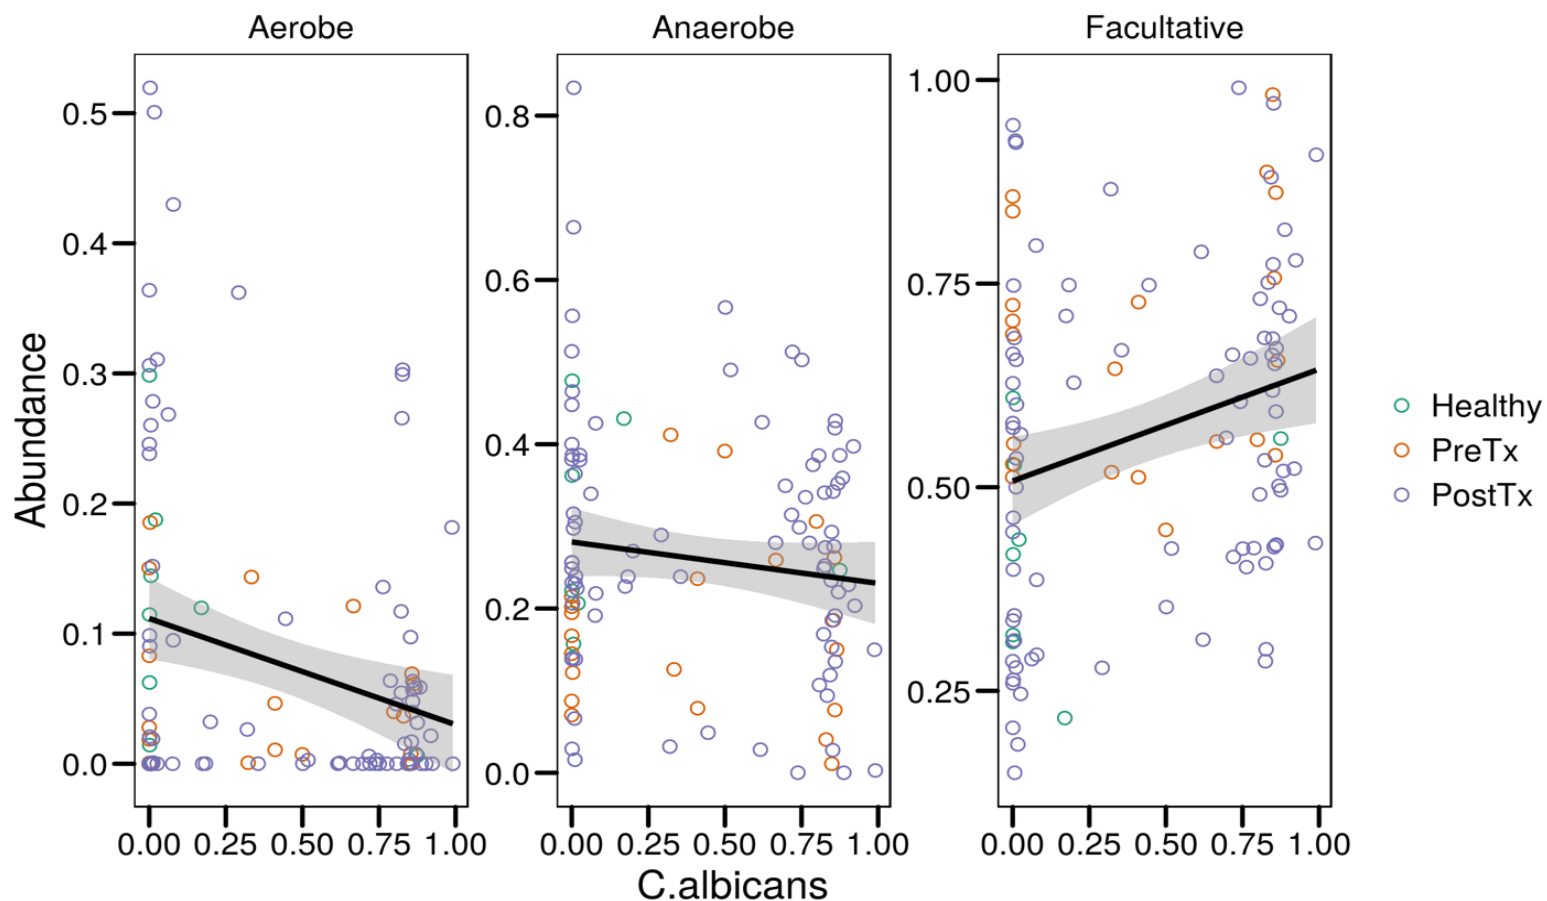

**Figure E7. Correlation between *Candida albicans* and bacterial respiration phenotypes.** Relative abundance of aerobe, anaerobe and facultative bacteria in each sample was compared to relative abundance of *Candida albicans*. *C. albicans* abundance is correlated inversely with aerobe and positively with facultative populations ( $p < 0.05$ ), but not with anaerobic bacteria ( $p = 0.17$ ). P-values were obtained from a linear model.
